# Supplementary material for: Genomics, Exometabolomics, and Metabolic Probing Reveal Conserved Proteolytic Metabolism of Thermoflexus hugenholtzii and Three Candidate Species From China and Japan
Source: Front Microbiol. 2021 May 3;12:632731. doi: 10.3389/fmicb.2021.632731 (PMC8129789; doi:10.3389/fmicb.2021.632731)
Supplement: Supplementary file 5 [file Table_5.XLSX]

## Sheet: Sheet1
Supplemental Table S5. Local protein BLAST+ results for nosZDYL and coxMSLF for all MAGs. T. thugenholtzii JAD2T translated genes were used as the query against MAG databases. Top hits are shown for all MAGs. If a gene is not reported, no hits were found.
		Query accession dot version	Subject accession dot version (database hit)	Percentage of identical matches	Alignment length	Number of mismatches	Number of gap openings	Start of alignment in query	End of alignment in query	Start of alignment in subject (database hit)	End of alignment in subject (database hit)	Expectation value (E-value)	Bit score	All subject Seq-id(s), separated by a ';'	Raw score	Number of identical matches	Number of positive-scoring matches	Total number of gaps	Percentage of positive-scoring matches	Query frame	Subject frame	Aligned part of query sequence	Aligned part of subject sequence	Query sequence length	Subject sequence length	All subject title(s), separated by a '<>'
GBS85_2	nosZ	2143742820_nosZJAD2	3300020145.a:Ga0197144_100186_8	100	662	0	0	1	662	1	662	0	1358	3300020145.a:Ga0197144_100186_8	3516	662	662	0	100	1	1	MMHGKAKGVILGVLMALVAACARGRATPVAGLPAEAQTVIRERGLSPEDVVAALRTYMPGGKYDEYVMFSSGGHSGQVLVIGIPSMRLLKVIGVFTPEPWQGYGFGEKGTLEVLAEGFARGKPLLWGDTHHPALSETEGEYDGQFLFINDKANARLAVIDLRDFETKQIVKNPNAISDHGGGFVTPNTEYVVEGPQYAAPIGWEYAPLDQYKDKYRGLLTFWAFDRQKGRVDLDRSFQIELPPYWQDLCDAGKKVSYGWVFCNSINTEMATGGIEEGNPPFEAGTAKNEMDYLHIINWKKAEELIRAGKYEVINGIKVIRLETAAREGVLFFAPEPKSPHGVDVAPGGEYIVVGGKLDPHVTIYSFEKIQKAIAAGNFERDPFGVPVLRFEDVKEAQVE…	MMHGKAKGVILGVLMALVAACARGRATPVAGLPAEAQTVIRERGLSPEDVVAALRTYMPGGKYDEYVMFSSGGHSGQVLVIGIPSMRLLKVIGVFTPEPWQGYGFGEKGTLEVLAEGFARGKPLLWGDTHHPALSETEGEYDGQFLFINDKANARLAVIDLRDFETKQIVKNPNAISDHGGGFVTPNTEYVVEGPQYAAPIGWEYAPLDQYKDKYRGLLTFWAFDRQKGRVDLDRSFQIELPPYWQDLCDAGKKVSYGWVFCNSINTEMATGGIEEGNPPFEAGTAKNEMDYLHIINWKKAEELIRAGKYEVINGIKVIRLETAAREGVLFFAPEPKSPHGVDVAPGGEYIVVGGKLDPHVTIYSFEKIQKAIAAGNFERDPFGVPVLRFEDVKEAQVE…	662	663	3300020145.a:Ga0197144_100186_8 # 6812 # 8800 # -1 # ID=208_8;partial=00;start_type=ATG;rbs_motif=AGGAGG;rbs_spacer=5-10bp;gc_cont=0.652
	nosD	2143742818_nosDJAD2	3300020145.a:Ga0197144_100186_6	100	742	0	0	1	742	1	742	0	1479	3300020145.a:Ga0197144_100186_6	3828	742	742	0	100	1	1	MILPLALALWALLGGAPADPGRSLQEAIDAAPPGATLEVRGGVHYGPIRIDKPLTLIGVDSPVLDGQGQGTVLWITAPGVTVRGFVIRRSGRSLTHEDAGIRAEGAPGVILEDNRLEDVLFGIYLKDSPGARIRNNRIRGLDVPEAERGDAIRLWYSSDAYIEGNETERGRDVIIWFSDRSVLRDNRFRGGRYGIHYMYCNESLAEGNILEGNYVGIYMMYSRGGVFRRNRFLHHRGPSGYGMAFKDSDEILAEENLFANNTAALFLDNTPRAEGSPVRFERNLFAYNGIGVLALPMVRGAIFRENVFWENEQQAAVQGEGNLQANRWEGNFWSDYVGFDVDGDGIGDLPYRSQRLFEALTDAMPALRIFWGTPAVQALETAARLVPFFAPQVRLEDPA…	MILPLALALWALLGGAPADPGRSLQEAIDAAPPGATLEVRGGVHYGPIRIDKPLTLIGVDSPVLDGQGQGTVLWITAPGVTVRGFVIRRSGRSLTHEDAGIRAEGAPGVILEDNRLEDVLFGIYLKDSPGARIRNNRIRGLDVPEAERGDAIRLWYSSDAYIEGNETERGRDVIIWFSDRSVLRDNRFRGGRYGIHYMYCNESLAEGNILEGNYVGIYMMYSRGGVFRRNRFLHHRGPSGYGMAFKDSDEILAEENLFANNTAALFLDNTPRAEGSPVRFERNLFAYNGIGVLALPMVRGAIFRENVFWENEQQAAVQGEGNLQANRWEGNFWSDYVGFDVDGDGIGDLPYRSQRLFEALTDAMPALRIFWGTPAVQALETAARLVPFFAPQVRLEDPA…	742	743	3300020145.a:Ga0197144_100186_6 # 3805 # 6033 # -1 # ID=208_6;partial=00;start_type=ATG;rbs_motif=AGGAG;rbs_spacer=5-10bp;gc_cont=0.700
	nosY	2143742817_nosYJAD2	3300020145.a:Ga0197144_100186_5	99.642	279	1	0	1	279	1	279	0	511	3300020145.a:Ga0197144_100186_5	1315	278	278	0	99.64	1	1	MGATRWMIWKEGREILRSRWFGITAGSFVAVALALAALSMGGSGYIGLAGFGRTAAALVNLSALIASLMGLGLGAMTWAAERESGTLAYLLSYPVSRAQVWAAKAIGGAMALAAAMALGFGITGLIIGLGGGLGGAEEAGRYAALAAGATLLAWITYGLGMTLGVGLRRQSTALGLSLLAWLAGVFLSDLGLMGLVGTFALSPAVLWWLTVLNPLHAFRILAMVWLNGSPDLLGPAGAYAWRTYGEALGPMLTAIMLGWLALAFLMAALRFGRLQDIAA	MGATRWMIWKEGREILRSRWFGITAGSFVAVALALAALSMAGSGYIGLAGFGRTAAALVNLSALIASLMGLGLGAMTWAAERESGTLAYLLSYPVSRAQVWAAKAIGGAMALAAAMALGFGITGLIIGLGGGLGGAEEAGRYAALAAGATLLAWITYGLGMTLGVGLRRQSTALGLSLLAWLAGVFLSDLGLMGLVGTFALSPAVLWWLTVLNPLHAFRILAMVWLNGSPDLLGPAGAYAWRTYGEALGPMLTAIMLGWLALAFLMAALRFGRLQDIAA	279	280	3300020145.a:Ga0197144_100186_5 # 2953 # 3792 # -1 # ID=208_5;partial=00;start_type=ATG;rbs_motif=GGxGG;rbs_spacer=5-10bp;gc_cont=0.715
	nosL	2143742816_nosL	3300020145.a:Ga0197144_100186_4	99.342	152	1	0	1	152	1	152	9.98e-112	310	3300020145.a:Ga0197144_100186_4	795	151	151	0	99.34	1	1	MMRRMVAIALMLAGLVACARPSGPRPPDIVYGKDPCANCGMLINDPRFAAAYVTRNGQARLFDDIGCMIDYQRGHPEDVAAFYVRDFEGGGWIETDRATFVHAPDVPTPMGYGLLAFATRDRAEAFARDHGGQVMDWATARQTVRSPHRHGP	MMRRMVAIALMLAGLVACARPSGPRPPDIVYGKDPCANCGMLINDPRFAAAYVTRNGQARLFDDIGCMIDYQRGHPEDVAAFYVRDFEGGGWIEADRATFVHAPDVPTPMGYGLLAFATRDRAEAFARDHGGQVMDWATARQTVRSPHRHGP	152	153	3300020145.a:Ga0197144_100186_4 # 2465 # 2923 # -1 # ID=208_4;partial=00;start_type=ATG;rbs_motif=AGGAGG;rbs_spacer=3-4bp;gc_cont=0.678
	coxM	2143740265_coxM_JAD2	3300020145.a:Ga0197144_100483_17	43.571	280	152	3	1	280	1	274	8.23e-61	192	3300020145.a:Ga0197144_100483_17	487	122	167	6	59.64	1	1	MFPAPFEYVAPSTLDQAIRLLQQHGPDARLLAGGQSLIPMMRFRLVNPRILIDLHRIPGLDLLEEAQGVLRIGAMVRHRTVERAPLIQQRYPLLADTARVIADPIVRNRGTVGGSIAHADPAGDWGAALLAAKAEVVITGPQGRRIRQRAMPLEEFFTGPFMTALEPGEIVTEIRVPAPGPREAGAYLKIERKVGDFAVVAVGVQIALDADGICRKAGIGLCAVGPTSLRAREAEEWLIGKRLDEGVIARAGELAAAASQPNSDTRGPAEYKRDMVRVLT	MYPASFEYYRASTLQEALNLLKQH-PEAKLLAGGHSLIPLMKLRLASPPALVDIRRVAELKGIRRTDGTVVIGALTTHREVEFSEELKQWCPLLPEVAAHIGDPPVRNMGTIGGSLAHADPAADYPAAMLALGATIKAVGPNG----ERTIAADDFFVGMLTTALQPGEILTEVHVPVLGKGTGWAYEKFPHPASRYAVVGVAAVVRVE-NGVCREARIGVTGAAPKAFRATNVEQALAGKRLDEGTVRAATENMVSPEGLLSDPFASAAYRAHLCAVLT	294	288	3300020145.a:Ga0197144_100483_17 # 15435 # 16298 # 1 # ID=87_17;partial=00;start_type=ATG;rbs_motif=AGGAGG;rbs_spacer=5-10bp;gc_cont=0.704
	coxS	2143740266_coxS_JAD2	3300020145.a:Ga0197144_101209_7	100	182	0	0	3	184	1	182	5.38e-137	377	3300020145.a:Ga0197144_101209_7	967	182	182	0	100	1	1	ARKGKRTTGAPRRGSTPEAVEAPRPAARQRIHVTVNGRPYEAEVEARTLLVYFIRDTLGLTGTHVGCDTTSCGACTVLLNGEAVKSCTVFAIQADGAEIMTVEGLAKDGELHPLQKAFWEHHGLQCGFCTPGMLMAAYAFLKENPRPSEEEIRIAISGNLCRCTGYMNIVKAIQHAAQEMAA	ARKGKRTTGAPRRGSTPEAVEAPRPAARQRIHVTVNGRPYEAEVEARTLLVYFIRDTLGLTGTHVGCDTTSCGACTVLLNGEAVKSCTVFAIQADGAEIMTVEGLAKDGELHPLQKAFWEHHGLQCGFCTPGMLMAAYAFLKENPRPSEEEIRIAISGNLCRCTGYMNIVKAIQHAAQEMAA	184	183	3300020145.a:Ga0197144_101209_7 # 7377 # 7925 # -1 # ID=209_7;partial=01;start_type=Edge;rbs_motif=None;rbs_spacer=None;gc_cont=0.654
	coxL	2143740267_coxL	3300020145.a:Ga0197144_101209_6	100	783	0	0	1	783	1	783	0	1603	3300020145.a:Ga0197144_101209_6	4152	783	783	0	100	1	1	MALPEQAHAVLGHPVRRKEDMRFIQGRGRYLDDIVLPRMAYLALVRSPYAHARIRSIRVDAAKAIPGVLAVITGEDLEELGLAWMPTLAGDKQMVLAVGKVLFQYQEVAAVVGETREAAVDGAQAVEVDYEPLPVVVDPFRALEPDAPVLREDREQKTNHIWHWEVGDREATEEALRRSDVVIRERIRFQRVHPAPLEPCGCIADFDRITGRLTLYVTSQAPHAYRTLLALVTKLPEHMIRVISPDIGGGFGNKVAIYPGYVCAVVASMMLGRPVKWVETRTENLTSTSFARDYHMMVELGATREGKVTALRVKTIADHGAFDASANPTRFPAGLFSICTGSYDFPVAFAEVDAVYTNKAPGGISYRCSFRVTEASYLIERAMDILADELGMDPAELRR…	MALPEQAHAVLGHPVRRKEDMRFIQGRGRYLDDIVLPRMAYLALVRSPYAHARIRSIRVDAAKAIPGVLAVITGEDLEELGLAWMPTLAGDKQMVLAVGKVLFQYQEVAAVVGETREAAVDGAQAVEVDYEPLPVVVDPFRALEPDAPVLREDREQKTNHIWHWEVGDREATEEALRRSDVVIRERIRFQRVHPAPLEPCGCIADFDRITGRLTLYVTSQAPHAYRTLLALVTKLPEHMIRVISPDIGGGFGNKVAIYPGYVCAVVASMMLGRPVKWVETRTENLTSTSFARDYHMMVELGATREGKVTALRVKTIADHGAFDASANPTRFPAGLFSICTGSYDFPVAFAEVDAVYTNKAPGGISYRCSFRVTEASYLIERAMDILADELGMDPAELRR…	783	784	3300020145.a:Ga0197144_101209_6 # 4997 # 7348 # -1 # ID=209_6;partial=00;start_type=ATG;rbs_motif=AGGAGG;rbs_spacer=5-10bp;gc_cont=0.654
	coxF	2143740268_coxF_JAD2	3300020145.a:Ga0197144_101209_5	100	335	0	0	1	335	1	335	0	669	3300020145.a:Ga0197144_101209_5	1725	335	335	0	100	1	1	MGWRLSGGLRLDELIRDLEARGEAFVIATVVRRQPPVSAHVGDRAVITADGRIYGWVGGGCAHDLILREARAVLASRRPRLLRIAPEANGEDIEEEARTVATMACPSRGELEVFLEPWVREPQLLIFGESPLAQALAVFGQVLGYEVTRLVQRMPSPEETSGIRLTPLEAMPAFSPNDELYVVVASMGHYDEEALAAALRTPARYIGLVASRRRAQALLNFLQQSGWSEADLGRIRAPAGLDLGAVTQEEIALAVMAEIMQERRRAMAERMVSLESTSPRARDPVCGMEVEVATARYHVEWGGQRFYFCCAHCRQAFLADPARYTPAVAQPERGQ	MGWRLSGGLRLDELIRDLEARGEAFVIATVVRRQPPVSAHVGDRAVITADGRIYGWVGGGCAHDLILREARAVLASRRPRLLRIAPEANGEDIEEEARTVATMACPSRGELEVFLEPWVREPQLLIFGESPLAQALAVFGQVLGYEVTRLVQRMPSPEETSGIRLTPLEAMPAFSPNDELYVVVASMGHYDEEALAAALRTPARYIGLVASRRRAQALLNFLQQSGWSEADLGRIRAPAGLDLGAVTQEEIALAVMAEIMQERRRAMAERMVSLESTSPRARDPVCGMEVEVATARYHVEWGGQRFYFCCAHCRQAFLADPARYTPAVAQPERGQ	335	336	3300020145.a:Ga0197144_101209_5 # 3883 # 4890 # -1 # ID=209_5;partial=00;start_type=ATG;rbs_motif=GGAGG;rbs_spacer=5-10bp;gc_cont=0.681
		Query accession dot version	Subject accession dot version (database hit)	Percentage of identical matches	Alignment length	Number of mismatches	Number of gap openings	Start of alignment in query	End of alignment in query	Start of alignment in subject (database hit)	End of alignment in subject (database hit)	Expectation value (E-value)	Bit score	All subject Seq-id(s), separated by a ';'	Raw score	Number of identical matches	Number of positive-scoring matches	Total number of gaps	Percentage of positive-scoring matches	Query frame	Subject frame	Aligned part of query sequence	Aligned part of subject sequence	Query sequence length	Subject sequence length	All subject title(s), separated by a '<>'
GBS70_5	nosZ	2143742820_nosZJAD2	3300020139.a:Ga0197143_1001076_2	99.849	662	1	0	1	662	1	662	0	1357	3300020139.a:Ga0197143_1001076_2	3512	661	662	0	100	1	1	MMHGKAKGVILGVLMALVAACARGRATPVAGLPAEAQTVIRERGLSPEDVVAALRTYMPGGKYDEYVMFSSGGHSGQVLVIGIPSMRLLKVIGVFTPEPWQGYGFGEKGTLEVLAEGFARGKPLLWGDTHHPALSETEGEYDGQFLFINDKANARLAVIDLRDFETKQIVKNPNAISDHGGGFVTPNTEYVVEGPQYAAPIGWEYAPLDQYKDKYRGLLTFWAFDRQKGRVDLDRSFQIELPPYWQDLCDAGKKVSYGWVFCNSINTEMATGGIEEGNPPFEAGTAKNEMDYLHIINWKKAEELIRAGKYEVINGIKVIRLETAAREGVLFFAPEPKSPHGVDVAPGGEYIVVGGKLDPHVTIYSFEKIQKAIAAGNFERDPFGVPVLRFEDVKEAQVE…	MMHGKAKGVILGVLMALVAACARGRATPVAGLPAEAQTVIRERGLSPEDVVAALRTYMPGGKYDEYVMFSSGGHSGQVLVIGIPSMRLLKVIGVFTPEPWQGYGFGEKGTLEVLAEGFARGKPLLWGDTHHPALSETEGEYDGQFLFINDKANARLAVIDLRDFETKQIVKNPNAISDHGGGFVTPNTEYVVEGPQYAAPIGWEYAPLDQYKDKYRGLLTFWAFDRQKGRVDLDRSFQIELPPYWQDLCDAGKKVSYGWVFCNSINTEMATGGIEEGNPPFEAGTAKNEMDYLHIINWKKAEELIRAGKYEVINGIKVIRLETAAREGVLFFAPEPKSPHGVDVAPGGEYIVVGGKLDPHVTIYSFEKIQKAIAAGNFERDPFGVPVLKFEDVKEAQVE…	662	663	3300020139.a:Ga0197143_1001076_2 # 713 # 2701 # 1 # ID=248_2;partial=00;start_type=ATG;rbs_motif=AGGAGG;rbs_spacer=5-10bp;gc_cont=0.652
	nosD	2143742818_nosDJAD2	3300020139.a:Ga0197143_1001076_4	99.461	742	4	0	1	742	1	742	0	1469	3300020139.a:Ga0197143_1001076_4	3803	738	738	0	99.46	1	1	MILPLALALWALLGGAPADPGRSLQEAIDAAPPGATLEVRGGVHYGPIRIDKPLTLIGVDSPVLDGQGQGTVLWITAPGVTVRGFVIRRSGRSLTHEDAGIRAEGAPGVILEDNRLEDVLFGIYLKDSPGARIRNNRIRGLDVPEAERGDAIRLWYSSDAYIEGNETERGRDVIIWFSDRSVLRDNRFRGGRYGIHYMYCNESLAEGNILEGNYVGIYMMYSRGGVFRRNRFLHHRGPSGYGMAFKDSDEILAEENLFANNTAALFLDNTPRAEGSPVRFERNLFAYNGIGVLALPMVRGAIFRENVFWENEQQAAVQGEGNLQANRWEGNFWSDYVGFDVDGDGIGDLPYRSQRLFEALTDAMPALRIFWGTPAVQALETAARLVPFFAPQVRLEDPA…	MILPLALALWALLGGAPADPGRSLQEAIDAAPPGATLEVRGGVHYGPIRIDKPLTLIGVDSPVLDGQGQGTVLWITAPGVTVRGFGIRRSGRSLTHEDAGIRVEGAPGVILEDNRLEDVLFGIYLKDSPGARIRNNHIRGLDVPEAERGDAIRLWYSSDAYIEGNETERGRDVIIWFSDRSVLRDNRFRGGRYGIHYMYCNESLAEGNILEGNYVGIYMMYSRGGVFRRNRFLHHRGPSGYGMAFKDSDEILAEENLFANNTAALFLDNTPRAEGSPVRFERNLFAYNGIGVLALPMVRGAIFRENVFWENEQQAAVQGEGNLQANRWEGNFWSDYVGFDVDGDGIGDLPYRSQRLFEALTDAMPALRIFWGTPAVQALETAARLVPFFAPQVRLEDPA…	742	743	3300020139.a:Ga0197143_1001076_4 # 3480 # 5708 # 1 # ID=248_4;partial=00;start_type=ATG;rbs_motif=AGGAG;rbs_spacer=5-10bp;gc_cont=0.700
	nosY	2143742817_nosYJAD2	3300020139.a:Ga0197143_1001076_5	99.642	279	1	0	1	279	1	279	0	511	3300020139.a:Ga0197143_1001076_5	1315	278	278	0	99.64	1	1	MGATRWMIWKEGREILRSRWFGITAGSFVAVALALAALSMGGSGYIGLAGFGRTAAALVNLSALIASLMGLGLGAMTWAAERESGTLAYLLSYPVSRAQVWAAKAIGGAMALAAAMALGFGITGLIIGLGGGLGGAEEAGRYAALAAGATLLAWITYGLGMTLGVGLRRQSTALGLSLLAWLAGVFLSDLGLMGLVGTFALSPAVLWWLTVLNPLHAFRILAMVWLNGSPDLLGPAGAYAWRTYGEALGPMLTAIMLGWLALAFLMAALRFGRLQDIAA	MGATRWMIWKEGREILRSRWFGITAGSFVAVALALAALSMAGSGYIGLAGFGRTAAALVNLSALIASLMGLGLGAMTWAAERESGTLAYLLSYPVSRAQVWAAKAIGGAMALAAAMALGFGITGLIIGLGGGLGGAEEAGRYAALAAGATLLAWITYGLGMTLGVGLRRQSTALGLSLLAWLAGVFLSDLGLMGLVGTFALSPAVLWWLTVLNPLHAFRILAMVWLNGSPDLLGPAGAYAWRTYGEALGPMLTAIMLGWLALAFLMAALRFGRLQDIAA	279	280	3300020139.a:Ga0197143_1001076_5 # 5721 # 6560 # 1 # ID=248_5;partial=00;start_type=ATG;rbs_motif=GGxGG;rbs_spacer=5-10bp;gc_cont=0.715
	nosL	2143742816_nosL	3300020139.a:Ga0197143_1001076_6	94.079	152	9	0	1	152	1	152	4.7e-105	293	3300020139.a:Ga0197143_1001076_6	750	143	145	0	95.39	1	1	MMRRMVAIALMLAGLVACARPSGPRPPDIVYGKDPCANCGMLINDPRFAAAYVTRNGQARLFDDIGCMIDYQRGHPEDVAAFYVRDFEGGGWIETDRATFVHAPDVPTPMGYGLLAFATRDRAEAFARDHGGQVMDWATARQTVRSPHRHGP	MMRRMVAIALMLAGLVACARPSGPRPPDIVYGKDPCANCGMLINDPRFAAAYVTRNGQARLFDDIGCMIDYYRDHPEDVAAFYVRDFEGEGWIEADRATFVHAPDVPTPMGYGLLAFAARDRAEAFARDHGGQVMDWATARRTVQPPHRHAP	152	153	3300020139.a:Ga0197143_1001076_6 # 6590 # 7048 # 1 # ID=248_6;partial=00;start_type=ATG;rbs_motif=AGGAGG;rbs_spacer=3-4bp;gc_cont=0.684
	coxM	2143740265_coxM_JAD2	3300020139.a:Ga0197143_1004894_4	99.66	294	1	0	1	294	1	294	0	576	3300020139.a:Ga0197143_1004894_4	1485	293	293	0	99.66	1	1	MFPAPFEYVAPSTLDQAIRLLQQHGPDARLLAGGQSLIPMMRFRLVNPRILIDLHRIPGLDLLEEAQGVLRIGAMVRHRTVERAPLIQQRYPLLADTARVIADPIVRNRGTVGGSIAHADPAGDWGAALLAAKAEVVITGPQGRRIRQRAMPLEEFFTGPFMTALEPGEIVTEIRVPAPGPREAGAYLKIERKVGDFAVVAVGVQIALDADGICRKAGIGLCAVGPTSLRAREAEEWLIGKRLDEGVIARAGELAAAASQPNSDTRGPAEYKRDMVRVLTIRALRKALGRIPGA	MFPAPFEYVAPSTLDQAIRLLQQHGPDARLLAGGQSLIPMMRFRLVNPRILIDLHRIPGLDLLEEAQGVLRIGAMVRHRTVERAPLIQQRYPLLADTARVIADPIVRNRGTVGGSIAHADPAGDWGAALLAAKAEVVITGPQGRRIRQRAMPLEEFFTGPFMTALEPGEIVTEIRVPAPGPREAGTYLKIERKVGDFAVVAVGVQIALDADGICRKAGIGLCAVGPTSLRAREAEEWLIGKRLDEGVIARAGELAAAASQPNSDTRGPAEYKRDMVRVLTIRALRKALGRIPGA	294	295	3300020139.a:Ga0197143_1004894_4 # 3797 # 4681 # -1 # ID=67_4;partial=00;start_type=ATG;rbs_motif=AGxAGG/AGGxGG;rbs_spacer=5-10bp;gc_cont=0.687
	coxS	2143740266_coxS_JAD2	3300020139.a:Ga0197143_1004894_3	100	184	0	0	1	184	1	184	5.88e-139	381	3300020139.a:Ga0197143_1004894_3	979	184	184	0	100	1	1	MPARKGKRTTGAPRRGSTPEAVEAPRPAARQRIHVTVNGRPYEAEVEARTLLVYFIRDTLGLTGTHVGCDTTSCGACTVLLNGEAVKSCTVFAIQADGAEIMTVEGLAKDGELHPLQKAFWEHHGLQCGFCTPGMLMAAYAFLKENPRPSEEEIRIAISGNLCRCTGYMNIVKAIQHAAQEMAA	MPARKGKRTTGAPRRGSTPEAVEAPRPAARQRIHVTVNGRPYEAEVEARTLLVYFIRDTLGLTGTHVGCDTTSCGACTVLLNGEAVKSCTVFAIQADGAEIMTVEGLAKDGELHPLQKAFWEHHGLQCGFCTPGMLMAAYAFLKENPRPSEEEIRIAISGNLCRCTGYMNIVKAIQHAAQEMAA	184	185	3300020139.a:Ga0197143_1004894_3 # 3190 # 3744 # -1 # ID=67_3;partial=00;start_type=ATG;rbs_motif=GGAGG;rbs_spacer=5-10bp;gc_cont=0.659
	coxL	2143740267_coxL	3300020139.a:Ga0197143_1004894_2	100	783	0	0	1	783	1	783	0	1603	3300020139.a:Ga0197143_1004894_2	4152	783	783	0	100	1	1	MALPEQAHAVLGHPVRRKEDMRFIQGRGRYLDDIVLPRMAYLALVRSPYAHARIRSIRVDAAKAIPGVLAVITGEDLEELGLAWMPTLAGDKQMVLAVGKVLFQYQEVAAVVGETREAAVDGAQAVEVDYEPLPVVVDPFRALEPDAPVLREDREQKTNHIWHWEVGDREATEEALRRSDVVIRERIRFQRVHPAPLEPCGCIADFDRITGRLTLYVTSQAPHAYRTLLALVTKLPEHMIRVISPDIGGGFGNKVAIYPGYVCAVVASMMLGRPVKWVETRTENLTSTSFARDYHMMVELGATREGKVTALRVKTIADHGAFDASANPTRFPAGLFSICTGSYDFPVAFAEVDAVYTNKAPGGISYRCSFRVTEASYLIERAMDILADELGMDPAELRR…	MALPEQAHAVLGHPVRRKEDMRFIQGRGRYLDDIVLPRMAYLALVRSPYAHARIRSIRVDAAKAIPGVLAVITGEDLEELGLAWMPTLAGDKQMVLAVGKVLFQYQEVAAVVGETREAAVDGAQAVEVDYEPLPVVVDPFRALEPDAPVLREDREQKTNHIWHWEVGDREATEEALRRSDVVIRERIRFQRVHPAPLEPCGCIADFDRITGRLTLYVTSQAPHAYRTLLALVTKLPEHMIRVISPDIGGGFGNKVAIYPGYVCAVVASMMLGRPVKWVETRTENLTSTSFARDYHMMVELGATREGKVTALRVKTIADHGAFDASANPTRFPAGLFSICTGSYDFPVAFAEVDAVYTNKAPGGISYRCSFRVTEASYLIERAMDILADELGMDPAELRR…	783	784	3300020139.a:Ga0197143_1004894_2 # 810 # 3161 # -1 # ID=67_2;partial=00;start_type=ATG;rbs_motif=AGGAGG;rbs_spacer=5-10bp;gc_cont=0.655
	coxF	2143740268_coxF_JAD2	3300020139.a:Ga0197143_1004894_1	100	234	0	0	1	234	1	234	1.68e-168	464	3300020139.a:Ga0197143_1004894_1	1195	234	234	0	100	1	1	MGWRLSGGLRLDELIRDLEARGEAFVIATVVRRQPPVSAHVGDRAVITADGRIYGWVGGGCAHDLILREARAVLASRRPRLLRIAPEANGEDIEEEARTVATMACPSRGELEVFLEPWVREPQLLIFGESPLAQALAVFGQVLGYEVTRLVQRMPSPEETSGIRLTPLEAMPAFSPNDELYVVVASMGHYDEEALAAALRTPARYIGLVASRRRAQALLNFLQQSGWSEADLGR	MGWRLSGGLRLDELIRDLEARGEAFVIATVVRRQPPVSAHVGDRAVITADGRIYGWVGGGCAHDLILREARAVLASRRPRLLRIAPEANGEDIEEEARTVATMACPSRGELEVFLEPWVREPQLLIFGESPLAQALAVFGQVLGYEVTRLVQRMPSPEETSGIRLTPLEAMPAFSPNDELYVVVASMGHYDEEALAAALRTPARYIGLVASRRRAQALLNFLQQSGWSEADLGR	335	234	3300020139.a:Ga0197143_1004894_1 # 2 # 703 # -1 # ID=67_1;partial=10;start_type=ATG;rbs_motif=GGAGG;rbs_spacer=5-10bp;gc_cont=0.689
		Query accession dot version	Subject accession dot version (database hit)	Percentage of identical matches	Alignment length	Number of mismatches	Number of gap openings	Start of alignment in query	End of alignment in query	Start of alignment in subject (database hit)	End of alignment in subject (database hit)	Expectation value (E-value)	Bit score	All subject Seq-id(s), separated by a ';'	Raw score	Number of identical matches	Number of positive-scoring matches	Total number of gaps	Percentage of positive-scoring matches	Query frame	Subject frame	Aligned part of query sequence	Aligned part of subject sequence	Query sequence length	Subject sequence length	All subject title(s), separated by a '<>'
GBS60_20	nosZ	2143742820_nosZJAD2	3300020153.a:Ga0197142_1004312_8	30.612	98	62	2	565	662	57	148	1.46e-08	51.2	3300020153.a:Ga0197142_1004312_8	121	30	44	6	44.9	1	1	GRRVVEIWMTAVRSHFKPERVKVRKGDHVIWHITNIERARDATHGFALGGYNINLSLEPGETATIEFDADQSGTFPFYCTEFCSALHLEMMGYFLVEP	GRYVVNV--VAQMWAFNPREIRVPAGSLVTFNLVS----KDVQHGFQILNTNVNLMAVPGVVNRAQVRFDQPGEYLIVCHEYCGTGHHAMFAKVIVEP	662	172	3300020153.a:Ga0197142_1004312_8 # 5014 # 5529 # 1 # ID=149_8;partial=00;start_type=ATG;rbs_motif=GGAGG;rbs_spacer=5-10bp;gc_cont=0.651
	nosD	2143742818_nosDJAD2	3300020153.a:Ga0197142_1007881_4	38.117	223	130	4	453	667	3	225	5.87e-40	146	3300020153.a:Ga0197142_1007881_4	368	85	132	8	59.19	1	1	RQTPAAMLEIRGLRKRFGQTWVVRGLDLRVQPGEAVALWGPNGAGKTTVLRCILGLLS-FEGHIRVAGRDVRKEGPAARRAIGYVPQELAFY-SWTVRETLAFFA---ALRGVPVDPGIVEAMGLATYQDHP---VRALSGGLKQRLALALARMGDPPLLLLDEPTANLDMAARLEWMRQLQALKAQGKTLIFSSHRLEEILELADRVVVLREGQVVAEVAPE	KRTPNSVIKVDGLVKRYGDRVVLNGVSFSVWEGEIFGLLGPNGAGKTTLISILATLLPPDEGQVLICGYDLRREADRIRPLIGFVPQELALYPTLSAWDNLAFFGRIYGLRGTALQEHITTVLDLVGLRDRAGDAVRTFSGGMKRRLNIAAGLIHGPRLLLLDEPTVGVDPQSRNFIFEHIERLRAEGMTILYTTHYMEEAEQLCDRVAIMDEGRILALDTPK	742	318	3300020153.a:Ga0197142_1007881_4 # 2598 # 3551 # -1 # ID=55_4;partial=00;start_type=GTG;rbs_motif=GGA/GAG/AGG;rbs_spacer=5-10bp;gc_cont=0.632
	coxM	2143740265_coxM_JAD2	3300020153.a:Ga0197142_1013941_2	43.214	280	153	3	1	280	1	274	1.19e-60	191	3300020153.a:Ga0197142_1013941_2	485	121	167	6	59.64	1	1	MFPAPFEYVAPSTLDQAIRLLQQHGPDARLLAGGQSLIPMMRFRLVNPRILIDLHRIPGLDLLEEAQGVLRIGAMVRHRTVERAPLIQQRYPLLADTARVIADPIVRNRGTVGGSIAHADPAGDWGAALLAAKAEVVITGPQGRRIRQRAMPLEEFFTGPFMTALEPGEIVTEIRVPAPGPREAGAYLKIERKVGDFAVVAVGVQIALDADGICRKAGIGLCAVGPTSLRAREAEEWLIGKRLDEGVIARAGELAAAASQPNSDTRGPAEYKRDMVRVLT	MYPASFEYYRASTLQEALNLLKQH-PEAKLLAGGHSLIPLMKLRLASPPALVDIRRVAELKGIRRTDGTVVVGALTTHREVEFSEELKQWCPLLPEVAAHIGDPPVRNMGTIGGSLAHADPAADYPAAMLALGATIKAVGPNG----ERTIAADDFFVGMLTTALQPGEILTEVHVPVLGKGTGWAYEKFPHPASRYAVVGVAAVVRVE-NGVCREARIGVTGAAPKAFRATNVEQALAGKRLDEGTVRAATENMVSPEGLLSDPFASAAYRAHLCAVLT	294	288	3300020153.a:Ga0197142_1013941_2 # 309 # 1172 # -1 # ID=259_2;partial=00;start_type=ATG;rbs_motif=AGGAGG;rbs_spacer=5-10bp;gc_cont=0.706
	coxS	2143740266_coxS_JAD2	3300020153.a:Ga0197142_1005857_8	99.291	141	1	0	44	184	1	141	2.12e-104	292	3300020153.a:Ga0197142_1005857_8	748	140	140	0	99.29	1	1	AEVEARTLLVYFIRDTLGLTGTHVGCDTTSCGACTVLLNGEAVKSCTVFAIQADGAEIMTVEGLAKDGELHPLQKAFWEHHGLQCGFCTPGMLMAAYAFLKENPRPSEEEIRIAISGNLCRCTGYMNIVKAIQHAAQEMAA	AEVEARTLLVYFIRDTLGLTGTHVGCDTTSCGACTVLLNGEAVKSCNVFAIQADGAEIMTVEGLAKDGELHPLQKAFWEHHGLQCGFCTPGMLMAAYAFLKENPRPSEEEIRIAISGNLCRCTGYMNIVKAIQHAAQEMAA	184	142	3300020153.a:Ga0197142_1005857_8 # 9072 # 9497 # -1 # ID=220_8;partial=01;start_type=Edge;rbs_motif=None;rbs_spacer=None;gc_cont=0.622
	coxL	2143740267_coxL	3300020153.a:Ga0197142_1005857_7	100	783	0	0	1	783	1	783	0	1603	3300020153.a:Ga0197142_1005857_7	4152	783	783	0	100	1	1	MALPEQAHAVLGHPVRRKEDMRFIQGRGRYLDDIVLPRMAYLALVRSPYAHARIRSIRVDAAKAIPGVLAVITGEDLEELGLAWMPTLAGDKQMVLAVGKVLFQYQEVAAVVGETREAAVDGAQAVEVDYEPLPVVVDPFRALEPDAPVLREDREQKTNHIWHWEVGDREATEEALRRSDVVIRERIRFQRVHPAPLEPCGCIADFDRITGRLTLYVTSQAPHAYRTLLALVTKLPEHMIRVISPDIGGGFGNKVAIYPGYVCAVVASMMLGRPVKWVETRTENLTSTSFARDYHMMVELGATREGKVTALRVKTIADHGAFDASANPTRFPAGLFSICTGSYDFPVAFAEVDAVYTNKAPGGISYRCSFRVTEASYLIERAMDILADELGMDPAELRR…	MALPEQAHAVLGHPVRRKEDMRFIQGRGRYLDDIVLPRMAYLALVRSPYAHARIRSIRVDAAKAIPGVLAVITGEDLEELGLAWMPTLAGDKQMVLAVGKVLFQYQEVAAVVGETREAAVDGAQAVEVDYEPLPVVVDPFRALEPDAPVLREDREQKTNHIWHWEVGDREATEEALRRSDVVIRERIRFQRVHPAPLEPCGCIADFDRITGRLTLYVTSQAPHAYRTLLALVTKLPEHMIRVISPDIGGGFGNKVAIYPGYVCAVVASMMLGRPVKWVETRTENLTSTSFARDYHMMVELGATREGKVTALRVKTIADHGAFDASANPTRFPAGLFSICTGSYDFPVAFAEVDAVYTNKAPGGISYRCSFRVTEASYLIERAMDILADELGMDPAELRR…	783	784	3300020153.a:Ga0197142_1005857_7 # 6692 # 9043 # -1 # ID=220_7;partial=00;start_type=ATG;rbs_motif=AGGAGG;rbs_spacer=5-10bp;gc_cont=0.655
	coxF	2143740268_coxF_JAD2	3300020153.a:Ga0197142_1005857_6	100	335	0	0	1	335	1	335	0	669	3300020153.a:Ga0197142_1005857_6	1725	335	335	0	100	1	1	MGWRLSGGLRLDELIRDLEARGEAFVIATVVRRQPPVSAHVGDRAVITADGRIYGWVGGGCAHDLILREARAVLASRRPRLLRIAPEANGEDIEEEARTVATMACPSRGELEVFLEPWVREPQLLIFGESPLAQALAVFGQVLGYEVTRLVQRMPSPEETSGIRLTPLEAMPAFSPNDELYVVVASMGHYDEEALAAALRTPARYIGLVASRRRAQALLNFLQQSGWSEADLGRIRAPAGLDLGAVTQEEIALAVMAEIMQERRRAMAERMVSLESTSPRARDPVCGMEVEVATARYHVEWGGQRFYFCCAHCRQAFLADPARYTPAVAQPERGQ	MGWRLSGGLRLDELIRDLEARGEAFVIATVVRRQPPVSAHVGDRAVITADGRIYGWVGGGCAHDLILREARAVLASRRPRLLRIAPEANGEDIEEEARTVATMACPSRGELEVFLEPWVREPQLLIFGESPLAQALAVFGQVLGYEVTRLVQRMPSPEETSGIRLTPLEAMPAFSPNDELYVVVASMGHYDEEALAAALRTPARYIGLVASRRRAQALLNFLQQSGWSEADLGRIRAPAGLDLGAVTQEEIALAVMAEIMQERRRAMAERMVSLESTSPRARDPVCGMEVEVATARYHVEWGGQRFYFCCAHCRQAFLADPARYTPAVAQPERGQ	335	336	3300020153.a:Ga0197142_1005857_6 # 5578 # 6585 # -1 # ID=220_6;partial=00;start_type=ATG;rbs_motif=GGAGG;rbs_spacer=5-10bp;gc_cont=0.681
		Query accession dot version	Subject accession dot version (database hit)	Percentage of identical matches	Alignment length	Number of mismatches	Number of gap openings	Start of alignment in query	End of alignment in query	Start of alignment in subject (database hit)	End of alignment in subject (database hit)	Expectation value (E-value)	Bit score	All subject Seq-id(s), separated by a ';'	Raw score	Number of identical matches	Number of positive-scoring matches	Total number of gaps	Percentage of positive-scoring matches	Query frame	Subject frame	Aligned part of query sequence	Aligned part of subject sequence	Query sequence length	Subject sequence length	All subject title(s), separated by a '<>'
QQ28	nosZ	2143742820_nosZJAD2	NODE_8740_length_8742_cov_37.0751_5	95.156	640	31	0	23	662	22	661	0	1268	NODE_8740_length_8742_cov_37.0751_5	3280	609	628	0	98.12	1	1	RGRATPVAGLPAEAQTVIRERGLSPEDVVAALRTYMPGGKYDEYVMFSSGGHSGQVLVIGIPSMRLLKVIGVFTPEPWQGYGFGEKGTLEVLAEGFARGKPLLWGDTHHPALSETEGEYDGQFLFINDKANARLAVIDLRDFETKQIVKNPNAISDHGGGFVTPNTEYVVEGPQYAAPIGWEYAPLDQYKDKYRGLLTFWAFDRQKGRVDLDRSFQIELPPYWQDLCDAGKKVSYGWVFCNSINTEMATGGIEEGNPPFEAGTAKNEMDYLHIINWKKAEELIRAGKYEVINGIKVIRLETAAREGVLFFAPEPKSPHGVDVAPGGEYIVVGGKLDPHVTIYSFEKIQKAIAAGNFERDPFGVPVLRFEDVKEAQVELGLGPLHTVFDDKGYAYTSLFL…	RGAATPVAGLPAEAQAVIKERGLSPDDIVAALRTYIPGGKYDEYIMFSSGGHSGQVLVIGIPSMRLLKVIGVFTPEPWQGYGFGEKGTLEVLEGGFARGKPILWGDTHHPALSETEGEYDGQFLFINDKANARLAVIDLRDFETKQIVKNPNAISDHGGGFVTPNTEYVVEGPQYATPVGWEYAPLDQYKDKYRGLLTFWAFDRQKGRVDPDRSFQIELPPYWQDLCDAGKKVSYGWVFCNSINTEMATGGVEAGNPPFEAGTAKNEMDYLHIINWKKAEELIQAGKYEVMNGMKVLRLTTAAQEGVLFFAPEPKSPHGVDVAPGGEYIVVGGKLDPHVTIYSFEKIQKAIAAGNFERDPFGVPVLKFEDVKEAQVELGLGPLHTVFDDKGYAYTSLFL…	662	662	NODE_8740_length_8742_cov_37.0751_5 # 5099 # 7084 # -1 # ID=72_5;partial=00;start_type=ATG;rbs_motif=AGGAGG;rbs_spacer=5-10bp;gc_cont=0.627
	nosD	2143742818_nosDJAD2	NODE_8740_length_8742_cov_37.0751_3	73.819	741	191	1	1	741	1	738	0	1049	NODE_8740_length_8742_cov_37.0751_3	2712	547	613	3	82.73	1	1	MILPLALALWALLGGAPADPGRSLQEAIDAAPPGATLEVRGGVHYGPIRIDKPLTLIGVDSPVLDGQGQGTVLWITAPGVTVRGFVIRRSGRSLTHEDAGIRAEGAPGVILEDNRLEDVLFGIYLKDSPGARIRNNRIRGLDVPEAERGDAIRLWYSSDAYIEGNETERGRDVIIWFSDRSVLRDNRFRGGRYGIHYMYCNESLAEGNILEGNYVGIYMMYSRGGVFRRNRFLHHRGPSGYGMAFKDSDEILAEENLFANNTAALFLDNTPRAEGSPVRFERNLFAYNGIGVLALPMVRGAIFRENVFWENEQQAAVQGEGNLQANRWEGNFWSDYVGFDVDGDGIGDLPYRSQRLFEALTDAMPALRIFWGTPAVQALETAARLVPFFAPQVRLEDPA…	MMLRLALALWTLIVVTPGDPDRTLQEAIASAPPGATLEVRGGIYHGPVLIDKPLTLIGVDQPALDGQGQGTVLRITAPKVTVRGFVIRNSGRSLEHEDAGIRVEGASGVILEDNRLEEVLFGIYLKDSPGARIRNNTVIGLDVPEAERGDAIRLWYSPDAWIEGNRTLRGRDVIIWFSDRSVVQGNQFEGGRYGIHYMYCTGSQVEGNILRGNFVGAYVMYSRDLVFRNNRFLHQRGPSGYGLAFKDSDEIRVEENLFLDNTAAIFLDNTPRSEGSPVHFLRNVIAYNGIGVLALPMVRGVMFQGNVFWENEQQAATQGEGNLMANDWQGNFWSDYAGFDGDGDGVGDVPYRSRRIFEALVDQAPLLRLFWGTPVLQALETAALLVPFFEPPVRLEDPA…	742	742	NODE_8740_length_8742_cov_37.0751_3 # 2026 # 4251 # -1 # ID=72_3;partial=00;start_type=ATG;rbs_motif=GGAGG;rbs_spacer=5-10bp;gc_cont=0.661
	nosY	2143742817_nosYJAD2	NODE_8740_length_8742_cov_37.0751_2	75.556	270	66	0	7	276	7	276	3.14e-108	311	NODE_8740_length_8742_cov_37.0751_2	798	204	224	0	82.96	1	1	MIWKEGREILRSRWFGITAGSFVAVALALAALSMGGSGYIGLAGFGRTAAALVNLSALIASLMGLGLGAMTWAAERESGTLAYLLSYPVSRAQVWAAKAIGGAMALAAAMALGFGITGLIIGLGGGLGGAEEAGRYAALAAGATLLAWITYGLGMTLGVGLRRQSTALGLSLLAWLAGVFLSDLGLMGLVGTFALSPAVLWWLTVLNPLHAFRILAMVWLNGSPDLLGPAGAYAWRTYGEALGPMLTAIMLGWLALAFLMAALRFGRLQD	LIRKEGREAFRSRWFAITVGSFAAIALALAAFSMIGSGYVGLPGFGRTAATLVNLSMLLASLMGLGLGTLSWAVERENGTLAYLLSYPISRAQVFVAKAIGGALALAAAMALGFGAAGLGIGLGGGLGGPEEIARYTGLAVGATLLAWIAYGIGMAIGVGLRRQSTALGVTLIAWLIAVFLSDLGLMGLTWAIGLSPVWLWWLALLNPLHVFRILSMVMLNGSPDLLGPAGWFAWRTYGEALGSMLFGAMLIWLAFAFLVAALRFRMLRD	279	280	NODE_8740_length_8742_cov_37.0751_2 # 915 # 1754 # -1 # ID=72_2;partial=00;start_type=ATG;rbs_motif=AGxAGG/AGGxGG;rbs_spacer=5-10bp;gc_cont=0.661
	nosL	2143742816_nosL	NODE_8740_length_8742_cov_37.0751_1	64.516	155	52	1	1	152	1	155	3.19e-69	203	NODE_8740_length_8742_cov_37.0751_1	516	100	113	3	72.9	1	1	MMRRMVAIALMLAGLVACARPSGPRPPDIVYGKDPCANCGMLINDPRFAAAYVTRNGQARLFDDIGCMIDYQRGHPEDVAAFYVRDFEGGGWIETDRATFVHAPDVPTPMGYGLLAFATRDRAEAFARDHGGQVMDWATARQTVRSP---HRHGP	MTRLSRILVLLTWMLTACARPSGPRPPDIAYGKDPCAECGMIINDPRFAAAYVTRDGQARLFDDIGDMVVHYRKHLEDVAAFYVHDHETRAWIDATQAFFVHAPSIPSPMGYGLAAFSDRSRAEAFARAHGGEVRDWTRILQETQPPHGSHSHGP	152	156	NODE_8740_length_8742_cov_37.0751_1 # 313 # 780 # -1 # ID=72_1;partial=00;start_type=ATG;rbs_motif=GGAG/GAGG;rbs_spacer=5-10bp;gc_cont=0.650
	coxM	2143740265_coxM_JAD2	NODE_2138_length_30097_cov_38.7267_12	90.136	294	29	0	1	294	1	294	0	511	NODE_2138_length_30097_cov_38.7267_12	1315	265	281	0	95.58	1	1	MFPAPFEYVAPSTLDQAIRLLQQHGPDARLLAGGQSLIPMMRFRLVNPRILIDLHRIPGLDLLEEAQGVLRIGAMVRHRTVERAPLIQQRYPLLADTARVIADPIVRNRGTVGGSIAHADPAGDWGAALLAAKAEVVITGPQGRRIRQRAMPLEEFFTGPFMTALEPGEIVTEIRVPAPGPREAGAYLKIERKVGDFAVVAVGVQIALDADGICRKAGIGLCAVGPTSLRAREAEEWLIGKRLDEGVIARAGELAAAASQPNSDTRGPAEYKRDMVRVLTIRALRKALGRIPGA	MFPAPFEYVAPSTLDQAVRLLQQYGPDARILAGGQSLIPMMRFRLANPRVLIDLNRIPGLDFLEEDRGVLRIGAMVRHRLIERAPLIRQRYPLLADTARVIADPIVRNRGTVGGSVAHADPAGDWGAALLAAKAEVVISGPRGRRISQRTIPLAEFFTGPFMTALEPGEIVTEIRVPASGPREAGAYLKIERKVGDFAVVAVGVQIALDADGVCRKAGIGLCAVGPTSLRAQEAEEWLIGKRLDESTLARAGELAAAAAQPTSDTRGPAEYKRDMVRVLTIRALRKALERIPKA	294	295	NODE_2138_length_30097_cov_38.7267_12 # 11512 # 12396 # 1 # ID=93_12;partial=00;start_type=ATG;rbs_motif=AGGAGG;rbs_spacer=5-10bp;gc_cont=0.678
	coxS	2143740266_coxS_JAD2	NODE_2138_length_30097_cov_38.7267_13	85.326	184	27	0	1	184	1	184	8.46e-120	333	NODE_2138_length_30097_cov_38.7267_13	854	157	169	0	91.85	1	1	MPARKGKRTTGAPRRGSTPEAVEAPRPAARQRIHVTVNGRPYEAEVEARTLLVYFIRDTLGLTGTHVGCDTTSCGACTVLLNGEAVKSCTVFAIQADGAEIMTVEGLAKDGELHPLQKAFWEHHGLQCGFCTPGMLMAAYAFLKENPRPSEEEIRIAISGNLCRCTGYMNIVKAIQHAAQEMAA	MPARKGKRTAGAPRRAAPRKAAVAVQPAARHRIQVTVNGRPYEAEVEARTLLVYFLRDMLGLTGTHVGCDTTSCGACTILLNGEPVKSCTMFAVQADGAEILTVEGLARDGELHPLQKAFWEEHGLQCGFCTPGMLMTAYAFLNENPRPSEEEIRVALSGNLCRCTGYMNIVKAVQRAAQEMAA	184	186	NODE_2138_length_30097_cov_38.7267_13 # 12433 # 12990 # 1 # ID=93_13;partial=00;start_type=ATG;rbs_motif=GGAGG;rbs_spacer=5-10bp;gc_cont=0.659
	coxL	2143740267_coxL	NODE_2138_length_30097_cov_38.7267_14	95.913	783	32	0	1	783	1	783	0	1505	NODE_2138_length_30097_cov_38.7267_14	3896	751	771	0	98.47	1	1	MALPEQAHAVLGHPVRRKEDMRFIQGRGRYLDDIVLPRMAYLALVRSPYAHARIRSIRVDAAKAIPGVLAVITGEDLEELGLAWMPTLAGDKQMVLAVGKVLFQYQEVAAVVGETREAAVDGAQAVEVDYEPLPVVVDPFRALEPDAPVLREDREQKTNHIWHWEVGDREATEEALRRSDVVIRERIRFQRVHPAPLEPCGCIADFDRITGRLTLYVTSQAPHAYRTLLALVTKLPEHMIRVISPDIGGGFGNKVAIYPGYVCAVVASMMLGRPVKWVETRTENLTSTSFARDYHMMVELGATREGKVTALRVKTIADHGAFDASANPTRFPAGLFSICTGSYDFPVAFAEVDAVYTNKAPGGISYRCSFRVTEASYLIERAMDILADELGMDPAELRR…	MATPEQPHVVLGHPVRRKEDIRFIQGRGRYLDDLVLPRMAYMALVRSPYAHARIRSIRTDAAKAIPGVLAVITGEDLEELGLAWMPTLAGDKQMVLAVGKVLFQYQEVAAVVAETRETAMDGVHAVEVDYEPLPVVVDPFKALEPDAPILREDREQKTNHIWHWEVGDREATEEALRRSDVVIREHIKFQRVHPAPLEPCGCIADFDRVTGRLTLYVTSQAPHAYRTLLALVAKLPEHMIRVISPDIGGGFGNKVAVYPGYVCAIVASIMLGRPVKWVETRTENLTSTSFARDYHMTVELGATRDGKVTALRVKTLADHGAFDASANPSRFPAGLFSICTGSYDFPVAFAEVDAAYTNKAPGGISYRCSFRVTEASYLIERAMDILADELGIDPAELRR…	783	784	NODE_2138_length_30097_cov_38.7267_14 # 13020 # 15371 # 1 # ID=93_14;partial=00;start_type=ATG;rbs_motif=GGAGG;rbs_spacer=5-10bp;gc_cont=0.648
	coxF	2143740268_coxF_JAD2	NODE_2138_length_30097_cov_38.7267_15	79.394	330	68	0	1	330	1	330	0	526	NODE_2138_length_30097_cov_38.7267_15	1356	262	290	0	87.88	1	1	MGWRLSGGLRLDELIRDLEARGEAFVIATVVRRQPPVSAHVGDRAVITADGRIYGWVGGGCAHDLILREARAVLASRRPRLLRIAPEANGEDIEEEARTVATMACPSRGELEVFLEPWVREPQLLIFGESPLAQALAVFGQVLGYEVTRLVQRMPSPEETSGIRLTPLEAMPAFSPNDELYVVVASMGHYDEEALAAALRTPARYIGLVASRRRAQALLNFLQQSGWSEADLGRIRAPAGLDLGAVTQEEIALAVMAEIMQERRRAMAERMVSLESTSPRARDPVCGMEVEVATARYHVEWGGQRFYFCCAHCRQAFLADPARYTPAVAQ	MSWRLCGGIRLDELIRDLEARGEAFVIATVVRRQPPVSARVGDRAVITAEGQIYGWVGGGCAHELILREARVVLATRRPRLLRLTPEASGGIVEDEARVEAMMTCPSRGELEVFLEPWVREPQLLIFGESPLAHALALFGQALGYEVTRVVRAEPSSKGPEGIRIARLEALPGFLPQDELYVVVASMGHYDEEALAAALRTPARYIGLVASRRRAQAVMDFLRQTGWSESELARIRAPAGLDLGAVTQEEIALSVMAEIMQERRRTMAAQAVSLEPPPERARDPVCGMEVEIATARYYADWGEERFYFCCPGCRQAFLTDPARYMPAAVQ	335	332	NODE_2138_length_30097_cov_38.7267_15 # 15396 # 16391 # 1 # ID=93_15;partial=00;start_type=ATG;rbs_motif=GGAGG;rbs_spacer=5-10bp;gc_cont=0.670
		Query accession dot version	Subject accession dot version (database hit)	Percentage of identical matches	Alignment length	Number of mismatches	Number of gap openings	Start of alignment in query	End of alignment in query	Start of alignment in subject (database hit)	End of alignment in subject (database hit)	Expectation value (E-value)	Bit score	All subject Seq-id(s), separated by a ';'	Raw score	Number of identical matches	Number of positive-scoring matches	Total number of gaps	Percentage of positive-scoring matches	Query frame	Subject frame	Aligned part of query sequence	Aligned part of subject sequence	Query sequence length	Subject sequence length	All subject title(s), separated by a '<>'
JZ2_71	nosZ	2143742820_nosZJAD2	NODE_25079_length_6609_cov_1.29929_4	93.958	662	40	0	1	662	1	662	0	1272	NODE_25079_length_6609_cov_1.29929_4	3292	622	641	0	96.83	1	1	MMHGKAKGVILGVLMALVAACARGRATPVAGLPAEAQTVIRERGLSPEDVVAALRTYMPGGKYDEYVMFSSGGHSGQVLVIGIPSMRLLKVIGVFTPEPWQGYGFGEKGTLEVLAEGFARGKPLLWGDTHHPALSETEGEYDGQFLFINDKANARLAVIDLRDFETKQIVKNPNAISDHGGGFVTPNTEYVVEGPQYAAPIGWEYAPLDQYKDKYRGLLTFWAFDRQKGRVDLDRSFQIELPPYWQDLCDAGKKVSYGWVFCNSINTEMATGGIEEGNPPFEAGTAKNEMDYLHIINWKKAEELIRAGKYEVINGIKVIRLETAAREGVLFFAPEPKSPHGVDVAPGGEYIVVGGKLDPHVTIYSFEKIQKAIAAGNFERDPFGVPVLRFEDVKEAQVE…	MMRWKKLAVIPMLLALLVAACARGAATPVAGLPAEAQAVIKERGLSPEDIVAALRTYIPGGKYDEYIMFASGGHSGQVLVIGIPSMRLLKVIGVFTPEPWQGYGFGEKGTLEVLEGGFARGKPILWGDTHHPALSETEGEYDGQFLFINDKANARLAVIDLRDFETKQIVKNPNAISDHGGGFVTPNTEYVVEGPQYATPVGWEYAPLDQYKDKYRGLLTFWAFDRQKGRVDPDRSFQIELPPYWQDLCDAGKKVSYGWVFCNSINTEMATGGVEAGNPPFEAGTAKNEMDYLHIINWKKAEELIRAGKYEVMNGMKVLRLTTAAQEGVLFFAPEPKSPHGVDVAPGGEYIVVGGKLDPHVTIYSFEKIQKAIAAGNFERDPFGVPVLKFEDVKEAQVE…	662	663	NODE_25079_length_6609_cov_1.29929_4 # 4235 # 6223 # -1 # ID=176_4;partial=00;start_type=ATG;rbs_motif=AGGAGG;rbs_spacer=5-10bp;gc_cont=0.631
	nosD	2143742818_nosDJAD2	NODE_25079_length_6609_cov_1.29929_2	73.954	741	190	1	1	741	1	738	0	1049	NODE_25079_length_6609_cov_1.29929_2	2712	548	612	3	82.59	1	1	MILPLALALWALLGGAPADPGRSLQEAIDAAPPGATLEVRGGVHYGPIRIDKPLTLIGVDSPVLDGQGQGTVLWITAPGVTVRGFVIRRSGRSLTHEDAGIRAEGAPGVILEDNRLEDVLFGIYLKDSPGARIRNNRIRGLDVPEAERGDAIRLWYSSDAYIEGNETERGRDVIIWFSDRSVLRDNRFRGGRYGIHYMYCNESLAEGNILEGNYVGIYMMYSRGGVFRRNRFLHHRGPSGYGMAFKDSDEILAEENLFANNTAALFLDNTPRAEGSPVRFERNLFAYNGIGVLALPMVRGAIFRENVFWENEQQAAVQGEGNLQANRWEGNFWSDYVGFDVDGDGIGDLPYRSQRLFEALTDAMPALRIFWGTPAVQALETAARLVPFFAPQVRLEDPA…	MMLRLALALWTLIVVTPGDPDRTLQEAIASAPPGATLEVRGGIYHGPVLIDKPLTLIGVDQPALDGQGQGTVLRITAPKVTVRGFVIRNSGRSLEHEDAGIRVEGASGVILEDNRLEGVLFGIYLKDSPGARIRNNTVIGLDVPEAERGDAIRLWYSPDAWIEGNRTLRGRDVIIWFSDRSVVRGNQFEGGRYGIHYMYCTGSQVEGNILRGNFVGAYVMYSRDLVFRNNRFLHQRGPSGYGLAFKDSDEIRVEENLFLDNTAAIFLDNTPRSEGSPVHFLRNVIAYNGIGVLALPMVRGVMFQGNVFWENEQQAATQGEGNLMANDWQGNFWSDYAGFDGDGDGVGDVPYRSRRIFEALVDQAPLLRLFWGTPVLQALETAALLVPFFEPPVRLEDPA…	742	742	NODE_25079_length_6609_cov_1.29929_2 # 1162 # 3387 # -1 # ID=176_2;partial=00;start_type=ATG;rbs_motif=GGAGG;rbs_spacer=5-10bp;gc_cont=0.662
	nosY	2143742817_nosYJAD2	NODE_25079_length_6609_cov_1.29929_1	74.815	270	68	0	7	276	7	276	1.77e-106	307	NODE_25079_length_6609_cov_1.29929_1	786	202	224	0	82.96	1	1	MIWKEGREILRSRWFGITAGSFVAVALALAALSMGGSGYIGLAGFGRTAAALVNLSALIASLMGLGLGAMTWAAERESGTLAYLLSYPVSRAQVWAAKAIGGAMALAAAMALGFGITGLIIGLGGGLGGAEEAGRYAALAAGATLLAWITYGLGMTLGVGLRRQSTALGLSLLAWLAGVFLSDLGLMGLVGTFALSPAVLWWLTVLNPLHAFRILAMVWLNGSPDLLGPAGAYAWRTYGEALGPMLTAIMLGWLALAFLMAALRFGRLQD	LIRKEGREAFRSRWFAITVGSFAAIALALAAFSMIGSGYVGLPGFGRTAATLVNLSMLLASLMGLGLGTLSWAVERENGTLAYLLSYPISRAQVFVAKAIGGALALAAAMALGFGAAGLGIGLGGGLGGPEEIARYTGLAVGATLLAWIAYGIGMAIGVGLRRQSTALGVTLIAWLIAVFLSDLGLMGLTWAIGLSPGWLWWLALLHPLHVFRILSMVMLHGSPDLLGPAGWFAWRTYGEALGSMLFGAMLIWLAFAFLVAALRFRMLRD	279	280	NODE_25079_length_6609_cov_1.29929_1 # 51 # 890 # -1 # ID=176_1;partial=00;start_type=ATG;rbs_motif=AGxAGG/AGGxGG;rbs_spacer=5-10bp;gc_cont=0.662
	coxM	2143740265_coxM_JAD2	NODE_5582_length_20819_cov_1.12641_12	88.435	294	34	0	1	294	1	294	0	499	NODE_5582_length_20819_cov_1.12641_12	1284	260	277	0	94.22	1	1	MFPAPFEYVAPSTLDQAIRLLQQHGPDARLLAGGQSLIPMMRFRLVNPRILIDLHRIPGLDLLEEAQGVLRIGAMVRHRTVERAPLIQQRYPLLADTARVIADPIVRNRGTVGGSIAHADPAGDWGAALLAAKAEVVITGPQGRRIRQRAMPLEEFFTGPFMTALEPGEIVTEIRVPAPGPREAGAYLKIERKVGDFAVVAVGVQIALDADGICRKAGIGLCAVGPTSLRAREAEEWLIGKRLDEGVIARAGELAAAASQPNSDTRGPAEYKRDMVRVLTIRALRKALGRIPGA	MFPAPFEYVAPSTLDQAVRLLQQYGPDARILAGGQSLIPMMRFRLANPRVLIDLNRIPGLDFLEEDRGVLRIGAMVRHRLIERAPLIRQRYPLLADTARVIADPIVRNRGTVGGSVAHADPAGDWGAALLAAKAEVVISGPRGRRISQRTIPLAEFFTGPFMTALEPGEIVTEIRVPASGPREAGRISRSERKVGDFAVVAVGVQIALDADGVCRKAGIGLCAVGPTSLRAQEAEEWLIGKRLDESTLARAGELAAAAAQPTSDTRGPAEYKRDMVRVLTIRALRKALERIPKA	294	295	NODE_5582_length_20819_cov_1.12641_12 # 11585 # 12469 # 1 # ID=263_12;partial=00;start_type=ATG;rbs_motif=AGGAGG;rbs_spacer=5-10bp;gc_cont=0.677
	coxS	2143740266_coxS_JAD2	NODE_5582_length_20819_cov_1.12641_13	85.326	184	27	0	1	184	1	184	7.37e-120	333	NODE_5582_length_20819_cov_1.12641_13	854	157	169	0	91.85	1	1	MPARKGKRTTGAPRRGSTPEAVEAPRPAARQRIHVTVNGRPYEAEVEARTLLVYFIRDTLGLTGTHVGCDTTSCGACTVLLNGEAVKSCTVFAIQADGAEIMTVEGLAKDGELHPLQKAFWEHHGLQCGFCTPGMLMAAYAFLKENPRPSEEEIRIAISGNLCRCTGYMNIVKAIQHAAQEMAA	MPARKGKRTAGAPRRAAPRKAAVAVQPAARHRIQVTVNGRPYEAEVEARTLLVYFLRDMLGLTGTHVGCDTTSCGACTILLNGEPVKSCTMFAVQADGAEILTVEGLARDGELHPLQKAFWEEHGLQCGFCTPGMLMTAYAFLNENPRPSEEEIRVALSGNLCRCTGYMNIVKAVQRAAQEMAA	184	186	NODE_5582_length_20819_cov_1.12641_13 # 12506 # 13063 # 1 # ID=263_13;partial=00;start_type=ATG;rbs_motif=GGAGG;rbs_spacer=5-10bp;gc_cont=0.659
	coxL	2143740267_coxL	NODE_5582_length_20819_cov_1.12641_14	95.658	783	34	0	1	783	1	783	0	1499	NODE_5582_length_20819_cov_1.12641_14	3880	749	769	0	98.21	1	1	MALPEQAHAVLGHPVRRKEDMRFIQGRGRYLDDIVLPRMAYLALVRSPYAHARIRSIRVDAAKAIPGVLAVITGEDLEELGLAWMPTLAGDKQMVLAVGKVLFQYQEVAAVVGETREAAVDGAQAVEVDYEPLPVVVDPFRALEPDAPVLREDREQKTNHIWHWEVGDREATEEALRRSDVVIRERIRFQRVHPAPLEPCGCIADFDRITGRLTLYVTSQAPHAYRTLLALVTKLPEHMIRVISPDIGGGFGNKVAIYPGYVCAVVASMMLGRPVKWVETRTENLTSTSFARDYHMMVELGATREGKVTALRVKTIADHGAFDASANPTRFPAGLFSICTGSYDFPVAFAEVDAVYTNKAPGGISYRCSFRVTEASYLIERAMDILADELGMDPAELRR…	MATPEQPHVVLGHPVRRKEDIRFIQGRGRYLDDLVLPRMAYMALVRSPYAHARIRSIRTDAAKAIPGVLAVITGEDLEELGLAWMPTLAGDKQMVLAVGKVLFQYQEVAAVVAETRETAMDGVHAVEVDYEPLPVVVDPFKALEPDAPILREDREQKTNHIWHWEVGDREATEEALRRSDVVIREHIKFQRVHPAPLEPCGCIADFDRVTGRLTLYVTSQAPHAYRTLLALVAKLPEHMIRVISPDIGGGFGNKVAVYPGYVCAIVASIMLGRPVKWVETRTENLTSTSFARDYHMTVELGATRDGKVTALRVKTLADHGAFDASANPSRFPAGLFSICTGSYDFPVAFAEVDAAYTNKAPGGISYRCSFRVTEASYLIERAMDILADELGIDPAELRR…	783	784	NODE_5582_length_20819_cov_1.12641_14 # 13093 # 15444 # 1 # ID=263_14;partial=00;start_type=ATG;rbs_motif=GGAGG;rbs_spacer=5-10bp;gc_cont=0.649
	coxF	2143740268_coxF_JAD2	NODE_5582_length_20819_cov_1.12641_15	79.394	330	68	0	1	330	1	330	0	526	NODE_5582_length_20819_cov_1.12641_15	1354	262	289	0	87.58	1	1	MGWRLSGGLRLDELIRDLEARGEAFVIATVVRRQPPVSAHVGDRAVITADGRIYGWVGGGCAHDLILREARAVLASRRPRLLRIAPEANGEDIEEEARTVATMACPSRGELEVFLEPWVREPQLLIFGESPLAQALAVFGQVLGYEVTRLVQRMPSPEETSGIRLTPLEAMPAFSPNDELYVVVASMGHYDEEALAAALRTPARYIGLVASRRRAQALLNFLQQSGWSEADLGRIRAPAGLDLGAVTQEEIALAVMAEIMQERRRAMAERMVSLESTSPRARDPVCGMEVEVATARYHVEWGGQRFYFCCAHCRQAFLADPARYTPAVAQ	MSWRLCGGIRLDELIRDLEARGEAFVIATVVRRQPPVSARVGDRAVITAEGQIYGWVGGGCAHELILREARVVLATRRPRLLRLTPEASGGIVEDEARVEAMMTCPSRGELEVFLEPWVREPQLLIFGESPLAHALALFGQALGYEVTRVVRAEPSSRGPEGIRIARLEALPGFLPQDELYVVVASMGHYDEEALAAALRTPARYIGLVASRRRAQAVMDFLRQTGWSESELARIRAPAGLDLGAVTQEEIALSVMAEIMQERRRTMAAQAVSLEPPPERARDPVCGMEVEIATARYYADWGEERFYFCCPGCRQAFLTDPARYMPAAVQ	335	332	NODE_5582_length_20819_cov_1.12641_15 # 15469 # 16464 # 1 # ID=263_15;partial=00;start_type=ATG;rbs_motif=GGAGG;rbs_spacer=5-10bp;gc_cont=0.672
		Query accession dot version	Subject accession dot version (database hit)	Percentage of identical matches	Alignment length	Number of mismatches	Number of gap openings	Start of alignment in query	End of alignment in query	Start of alignment in subject (database hit)	End of alignment in subject (database hit)	Expectation value (E-value)	Bit score	All subject Seq-id(s), separated by a ';'	Raw score	Number of identical matches	Number of positive-scoring matches	Total number of gaps	Percentage of positive-scoring matches	Query frame	Subject frame	Aligned part of query sequence	Aligned part of subject sequence	Query sequence length	Subject sequence length	All subject title(s), separated by a '<>'
GXS_4	nosZ	2143742820_nosZJAD2	$gname|GxsBSedJan11_1001253_9	95.312	640	30	0	23	662	22	661	0	1270	$gname|GxsBSedJan11_1001253_9	3286	610	628	0	98.12	1	1	RGRATPVAGLPAEAQTVIRERGLSPEDVVAALRTYMPGGKYDEYVMFSSGGHSGQVLVIGIPSMRLLKVIGVFTPEPWQGYGFGEKGTLEVLAEGFARGKPLLWGDTHHPALSETEGEYDGQFLFINDKANARLAVIDLRDFETKQIVKNPNAISDHGGGFVTPNTEYVVEGPQYAAPIGWEYAPLDQYKDKYRGLLTFWAFDRQKGRVDLDRSFQIELPPYWQDLCDAGKKVSYGWVFCNSINTEMATGGIEEGNPPFEAGTAKNEMDYLHIINWKKAEELIRAGKYEVINGIKVIRLETAAREGVLFFAPEPKSPHGVDVAPGGEYIVVGGKLDPHVTIYSFEKIQKAIAAGNFERDPFGVPVLRFEDVKEAQVELGLGPLHTVFDDKGYAYTSLFL…	RGAATPVAGLPAEAQAVIKERGLSPEDIVAALRTYIPGGKYDEYIMFASGGHSGQVLVIGIPSMRLLKVIGVFTPEPWQGYGFGEKGTLEVLEGGFARGKPILWGDTHHPALSETEGEYDGQFLFINDKANARLAVIDLRDFETKQIVKNPNAISDHGGGFVTPNTEYVVEGPQYATPVGWEYAPLDQYKDKYRGLLTFWAFDRQKGRVDPDRSFQIELPPYWQDLCDAGKKVSYGWVFCNSINTEMATGGVEAGNPPFEAGTAKNEMDYLHIINWKKAEELIRAGKYEVMNGMKVLRLTTAAQEGVLFFAPEPKSPHGVDVAPGGEYIVVGGKLDPHVTIYSFEKIQKAIAAGNFERDPFGVPVLKFEDVKEAQVELGLGPLHTVFDDKGYAYTSLFL…	662	662	$gname|GxsBSedJan11_1001253_9 # 10202 # 12187 # -1 # ID=167_9;partial=00;start_type=ATG;rbs_motif=AGGAGG;rbs_spacer=5-10bp;gc_cont=0.632
	nosD	2143742818_nosDJAD2	$gname|GxsBSedJan11_1001253_7	73.819	741	191	1	1	741	1	738	0	1044	$gname|GxsBSedJan11_1001253_7	2699	547	610	3	82.32	1	1	MILPLALALWALLGGAPADPGRSLQEAIDAAPPGATLEVRGGVHYGPIRIDKPLTLIGVDSPVLDGQGQGTVLWITAPGVTVRGFVIRRSGRSLTHEDAGIRAEGAPGVILEDNRLEDVLFGIYLKDSPGARIRNNRIRGLDVPEAERGDAIRLWYSSDAYIEGNETERGRDVIIWFSDRSVLRDNRFRGGRYGIHYMYCNESLAEGNILEGNYVGIYMMYSRGGVFRRNRFLHHRGPSGYGMAFKDSDEILAEENLFANNTAALFLDNTPRAEGSPVRFERNLFAYNGIGVLALPMVRGAIFRENVFWENEQQAAVQGEGNLQANRWEGNFWSDYVGFDVDGDGIGDLPYRSQRLFEALTDAMPALRIFWGTPAVQALETAARLVPFFAPQVRLEDPA…	MMLRLALALWTLIVVTPGDPDRTLQEAIASAPPGATLEVRGGIYHGPVLIDKPLTLIGVDQPALDGQGQGTVLRITAPKVTVRGFVIRNSGRSLEHEDAGIRVEGASGVILEDNRLEGVLFGIYLKDSPGARIRNNTVIGLDVPEAERGDAIRLWYSPDAWIEGNRTLRGRDVIIWFSDRSVVRGNQFEGGRYGIHYMYCTGSQVEGNILRGNFVGAYVMYSRDLVFRNNRFLHQRGPSGYGLAFKDSDEIRVEENLFLDNTAAIFLDNTPRSEGSPVHFLRNVIAYNGIGVLALPMVRGVMFQGNVFWENEQQAATQGEGNLMANDWQGNFWSDYAGFDGDGDGVGDVPYRSRRIFEALVDQAPLLRLFWGTPVLQALETAALLVPFFEPPVRLEDPA…	742	742	$gname|GxsBSedJan11_1001253_7 # 7129 # 9354 # -1 # ID=167_7;partial=00;start_type=ATG;rbs_motif=GGAGG;rbs_spacer=5-10bp;gc_cont=0.662
	nosY	2143742817_nosYJAD2	$gname|GxsBSedJan11_1001253_6	75.556	270	66	0	7	276	7	276	5.41e-108	311	$gname|GxsBSedJan11_1001253_6	796	204	224	0	82.96	1	1	MIWKEGREILRSRWFGITAGSFVAVALALAALSMGGSGYIGLAGFGRTAAALVNLSALIASLMGLGLGAMTWAAERESGTLAYLLSYPVSRAQVWAAKAIGGAMALAAAMALGFGITGLIIGLGGGLGGAEEAGRYAALAAGATLLAWITYGLGMTLGVGLRRQSTALGLSLLAWLAGVFLSDLGLMGLVGTFALSPAVLWWLTVLNPLHAFRILAMVWLNGSPDLLGPAGAYAWRTYGEALGPMLTAIMLGWLALAFLMAALRFGRLQD	LIRKEGREAFRSRWFAITVGSFAAIALALAAFSMIGSGYVGLPGFGRTAATLVNLSMLLASLMGLGLGTLSWAVERENGTLAYLLSYPISRAQVFVAKAIGGALALAAAMALGFGAAGLGIGLGGGLGGPEEIARYTGLAVGATLLAWIAYGIGMAIGVGLRRQSTALGVTLIAWLIAVFLSDLGLMGLTWAIGLSPVWLWWLALLNPLHGFRILSMVMLNGSPDLLGPAGWFAWRTYGEALGSMLFGAMLIWLAFAFLVAALRFRMLRD	279	280	$gname|GxsBSedJan11_1001253_6 # 6018 # 6857 # -1 # ID=167_6;partial=00;start_type=ATG;rbs_motif=AGxAGG/AGGxGG;rbs_spacer=5-10bp;gc_cont=0.660
	nosL	2143742816_nosL	$gname|GxsBSedJan11_1001253_5	65.806	155	50	1	1	152	1	155	1.46e-71	209	$gname|GxsBSedJan11_1001253_5	531	102	115	3	74.19	1	1	MMRRMVAIALMLAGLVACARPSGPRPPDIVYGKDPCANCGMLINDPRFAAAYVTRNGQARLFDDIGCMIDYQRGHPEDVAAFYVRDFEGGGWIETDRATFVHAPDVPTPMGYGLLAFATRDRAEAFARDHGGQVMDWATARQTVRSP---HRHGP	MTRLSRILVLLTWMLTACARPSGPRPPDIAYGKDPCAECGMIINDPRFAAAYVTRDGQARLFDDIGDMVVHYRKHLEDVVAFYVHDYETRAWIDATQAFFVHAPSIPSPMGYGLAAFSDRSRAEAFARAHGGEVKDWAWVLQEARSPHGSHSHGP	152	156	$gname|GxsBSedJan11_1001253_5 # 5416 # 5883 # -1 # ID=167_5;partial=00;start_type=ATG;rbs_motif=GGAG/GAGG;rbs_spacer=5-10bp;gc_cont=0.635
	coxM	2143740265_coxM_JAD2	$gname|GxsBSedJan11_1005585_2	44.483	290	155	3	1	290	1	284	1.3e-60	191	$gname|GxsBSedJan11_1005585_2	485	129	172	6	59.31	1	1	MFPAPFEYVAPSTLDQAIRLLQQHGPDARLLAGGQSLIPMMRFRLVNPRILIDLHRIPGLDLLEEAQGVLRIGAMVRHRTVERAPLIQQRYPLLADTARVIADPIVRNRGTVGGSIAHADPAGDWGAALLAAKAEVVITGPQGRRIRQRAMPLEEFFTGPFMTALEPGEIVTEIRVPAPGPREAGAYLKIERKVGDFAVVAVGVQIALDADGICRKAGIGLCAVGPTSLRAREAEEWLIGKRLDEGVIARAGELAAAASQPNSDTRGPAEYKRDMVRVLTIRALRKALGR	MYPASFNYYRAMTLQEALNLLRQH-PEAKVLAGGHSLIPLMKLRLANPPALVDIGRIAELKGIRRADGTVVIGALTTHREVEFSEELKQWCPLLPEVAAHIGDPPVRNMGTIGGSLAHADPAADYPAAMLALGATMKAVGPGGERM----IAADEFFLGMLTTALQPGEILTEVHVPVLGKGTGWAYEKFPHPASRYAVVGVAVVVRVE-NGICREARIGITGAAPRAFRATNVEQALAGKRLDEATVRAATENMVSPEGLLSDPFASAAYRAHLCAVLTRRALLRAAER	294	287	$gname|GxsBSedJan11_1005585_2 # 2182 # 3042 # 1 # ID=222_2;partial=00;start_type=ATG;rbs_motif=AGGAGG;rbs_spacer=5-10bp;gc_cont=0.677
	coxS	2143740266_coxS_JAD2	$gname|GxsBSedJan11_1005773_3	71.333	150	43	0	33	182	5	154	4.34e-83	239	$gname|GxsBSedJan11_1005773_3	610	107	131	0	87.33	1	1	IHVTVNGRPYEAEVEARTLLVYFIRDTLGLTGTHVGCDTTSCGACTVLLNGEAVKSCTVFAIQADGAEIMTVEGLAKDGELHPLQKAFWEHHGLQCGFCTPGMLMAAYAFLKENPRPSEEEIRIAISGNLCRCTGYMNIVKAIQHAAQEM	VTVTVNGQVYQREVEPRLLLVHFIREVLGLTGTHVGCDTSQCGACVVLMDGKAVKSCTVFAVQADGAQITTIEGLARNGQLHPLQEGFWEMHGLQCGYCTPGMIMTAVDFLQRNPNPTEEEIRHAIEGNLCRCTGYQNIVRAIQYAAEKM	184	159	$gname|GxsBSedJan11_1005773_3 # 2434 # 2910 # 1 # ID=30_3;partial=00;start_type=ATG;rbs_motif=AGGAGG;rbs_spacer=5-10bp;gc_cont=0.642
	coxL	2143740267_coxL	$gname|GxsBSedJan11_1005585_1	48.684	684	340	8	96	773	15	693	0	655	$gname|GxsBSedJan11_1005585_1	1690	333	462	11	67.54	1	1	LAVGKVLFQYQEVAAVVGETREAAVDGAQAVEVDYEPLPVVVDPFRALEPDAPVLREDREQKTNHIWHWEVGDREATEEALRRSDVVIRERIRFQRVHPAPLEPCGCIADFDRITGRLTLYVTSQAPHAYRTLLA-LVTKLPEHMIRVISPDIGGGFGNKVAIYPGYVCAVVASMMLGRPVKWVETRTENLTSTSFARDYHMMVELGATREGKVTALRVKTIADHGAFDASANPTRFPAGLF-SICTGSYDFPVAFAEVDAVYTNKAPGGISYRCSFRVTEASYLIERAMDILADELGMDPAELRRRNFIPPEKFPYRSALGWTYDSGNYVAALDRALELIGYEELRREQEERRRRGELMGIGISSYTEIVGAGPSHTFDIAGLK--MFDSCEIRVHPT…	MAVDKVRHVGEIVAVVIAQDRYTAEDAAELVEVEYEPLPAVADGAKALQPGAPAVHD--EAPDNVCFRWSIGDREKTDEAFRRAHRTVKVELVNQRLIPNAIEPRAAMAQYNPATDEYTLWVTSQNPHVHRLLLAAFVLGIPEHKLRVISPDVGGGFGSKIFVYPEETIVTWATKQVGRPVKWTARRRESFVSDAHGRDHITEAELAVDEKGKILGMRVKTIANLGAYLSTFAPA-IPTYLYGTLLSGQYEIPTIYCEVTGVFTHTTPVD-AYRGAGR-PEATYVVERLMDVMARELGEDPAEFRRKNFIPPDKFPYQTPVALQYDSGNYEGALNKALEVIRYKELRQQQEELRKQGRYIGIGFSCYIEACGIAPSQVVGSLGAQAGLWESALVRVHPT…	783	703	$gname|GxsBSedJan11_1005585_1 # 3 # 2111 # 1 # ID=222_1;partial=10;start_type=Edge;rbs_motif=None;rbs_spacer=None;gc_cont=0.664
	coxF	2143740268_coxF_JAD2	$gname|GxsBSedJan11_1002748_2	32.963	270	163	6	2	264	49	307	8.48e-24	96.3	$gname|GxsBSedJan11_1002748_2	238	89	131	18	48.52	1	1	GWRLSGGLRLDELIRDLEARGEAFVIATVVRRQPPVSAHVGDRAVITADGRIYGWVGGGCAHDLILREARAVLASRRPRLLRIAPEANGEDIEEEARTVATMACPSRGELEVFLEPWVREPQLLIFGESPLAQALAVFGQVLGYEVTRLVQR----MPS--PEETSGIRLTPLEAMPAFSPNDELYVVVASMGH-YDEEALAAALRTPARYIGLVASRRRAQALLNFLQQSGWSEADLGRIRAPAGLDLGAVTQEEIALAVMAEIMQERR	GWRVTMWDLYREVLRACE-ENRPVALCTVIRARGSVPRHEAAKMLVYPDGRIRGTIGGGEMEARVIREALQALQEGHPRLVRY----TLSDPQQGDPGVCG------GEMEIFIEPLLPPPTILIIGAGHVGRALAHLAKWLGFRVLVSDDRPEFCTPEWIPEADGFLAGPPEEVLPGAPIHAQTYIVLTTRNHPLDVRILPLILDTPAPYIGVIGSRRRWLLTAKVLHEKGIPLERLARVRSPVGLELNAETPEEIAVSIMAEIIAIRR	335	328	$gname|GxsBSedJan11_1002748_2 # 291 # 1274 # 1 # ID=338_2;partial=00;start_type=ATG;rbs_motif=GGAGG;rbs_spacer=3-4bp;gc_cont=0.665
		Query accession dot version	Subject accession dot version (database hit)	Percentage of identical matches	Alignment length	Number of mismatches	Number of gap openings	Start of alignment in query	End of alignment in query	Start of alignment in subject (database hit)	End of alignment in subject (database hit)	Expectation value (E-value)	Bit score	All subject Seq-id(s), separated by a ';'	Raw score	Number of identical matches	Number of positive-scoring matches	Total number of gaps	Percentage of positive-scoring matches	Query frame	Subject frame	Aligned part of query sequence	Aligned part of subject sequence	Query sequence length	Subject sequence length	All subject title(s), separated by a '<>'
QQ20	nosZ	2143742820_nosZJAD2	NODE_64_length_240112_cov_8.1109_188	94.411	662	37	0	1	662	1	662	0	1278	NODE_64_length_240112_cov_8.1109_188	3306	625	645	0	97.43	1	1	MMHGKAKGVILGVLMALVAACARGRATPVAGLPAEAQTVIRERGLSPEDVVAALRTYMPGGKYDEYVMFSSGGHSGQVLVIGIPSMRLLKVIGVFTPEPWQGYGFGEKGTLEVLAEGFARGKPLLWGDTHHPALSETEGEYDGQFLFINDKANARLAVIDLRDFETKQIVKNPNAISDHGGGFVTPNTEYVVEGPQYAAPIGWEYAPLDQYKDKYRGLLTFWAFDRQKGRVDLDRSFQIELPPYWQDLCDAGKKVSYGWVFCNSINTEMATGGIEEGNPPFEAGTAKNEMDYLHIINWKKAEELIRAGKYEVINGIKVIRLETAAREGVLFFAPEPKSPHGVDVAPGGEYIVVGGKLDPHVTIYSFEKIQKAIAAGNFERDPFGVPVLRFEDVKEAQVE…	MIRWKALTVVPLLLALLVAACARRAATPVAGLPAEAQTVIKERGLSPDDIVAALRAYVPGGKYDEYVMFASGGHSGQVLVIGIPSMRLLKVIGVFTPEPWQGYGFGEKGTLEVLEGGFARGKPILWGDTHHPALSETEGDYDGQFLFINDKANARLAVIDLRDFETKQIVKNPNAISDHGGGFVTPNTEYVVEGPQYAAPIGWEYAPLDQYRDKYRGLLTFWAFDRQKGRVDPDRSFQIELPPYWQDLCDAGKKVSYGWVFCNSINTEMATGGIEEGNPPFEAGTARNEMDYLHIINWKKAEELIQAGKYEVINGIKVIRLQTAAQEGVLFFAPEPKSPHGVDVAPGGEYIVVGGKLDPHVTIYSFEKIQKAIAAGNFERDPFGVPVLKFEDVKEAQVE…	662	663	NODE_64_length_240112_cov_8.1109_188 # 215431 # 217419 # -1 # ID=44_188;partial=00;start_type=ATG;rbs_motif=AGGAGG;rbs_spacer=5-10bp;gc_cont=0.644
	nosD	2143742818_nosDJAD2	NODE_64_length_240112_cov_8.1109_186	74.629	741	185	1	1	741	1	738	0	1070	NODE_64_length_240112_cov_8.1109_186	2768	553	615	3	83	1	1	MILPLALALWALLGGAPADPGRSLQEAIDAAPPGATLEVRGGVHYGPIRIDKPLTLIGVDSPVLDGQGQGTVLWITAPGVTVRGFVIRRSGRSLTHEDAGIRAEGAPGVILEDNRLEDVLFGIYLKDSPGARIRNNRIRGLDVPEAERGDAIRLWYSSDAYIEGNETERGRDVIIWFSDRSVLRDNRFRGGRYGIHYMYCNESLAEGNILEGNYVGIYMMYSRGGVFRRNRFLHHRGPSGYGMAFKDSDEILAEENLFANNTAALFLDNTPRAEGSPVRFERNLFAYNGIGVLALPMVRGAIFRENVFWENEQQAAVQGEGNLQANRWEGNFWSDYVGFDVDGDGIGDLPYRSQRLFEALTDAMPALRIFWGTPAVQALETAARLVPFFAPQVRLEDPA…	MMLRLALALWTLIVVVPGDPDRTLQEAIAAAPPGATLEVHGGVYHGPFLIDKPLTLIGVNRPVLDGQGQGTVLRIRAPHVTVRGFVIRNSGRSLEHEDAGILAEGAAGVTLEDNHLEDVLFGIYLKDAPGAHIRNNRVIGLDVPEAERGDAIRLWYSPDARIEGNRTRRGRDVIIWFSDRSLLRGNQFEGGRYGIHYMYCNGSQVEGNVLRGNFVGVFVMYSRGLALRGNRFLHQRGPSGYGLAFKDSDDVRVEGNLFLDNTAAIFLDNTPREEGSPVRFERNLIAYNGIGVLALPMVRGVTFRENVFWENEQQAATQGEGSLMASDWRGNFWSDYAGFDADGDGIGDVPYRSRRVFESLMDQAPPLRLFWGTPAMQALESAAILVPFFEPQIRLEDPA…	742	739	NODE_64_length_240112_cov_8.1109_186 # 212424 # 214640 # -1 # ID=44_186;partial=00;start_type=ATG;rbs_motif=GGAGG;rbs_spacer=5-10bp;gc_cont=0.673
	nosY	2143742817_nosYJAD2	NODE_64_length_240112_cov_8.1109_185	79.259	270	56	0	7	276	7	276	9.72e-116	331	NODE_64_length_240112_cov_8.1109_185	848	214	233	0	86.3	1	1	MIWKEGREILRSRWFGITAGSFVAVALALAALSMGGSGYIGLAGFGRTAAALVNLSALIASLMGLGLGAMTWAAERESGTLAYLLSYPVSRAQVWAAKAIGGAMALAAAMALGFGITGLIIGLGGGLGGAEEAGRYAALAAGATLLAWITYGLGMTLGVGLRRQSTALGLSLLAWLAGVFLSDLGLMGLVGTFALSPAVLWWLTVLNPLHAFRILAMVWLNGSPDLLGPAGAYAWRTYGEALGPMLTAIMLGWLALAFLMAALRFGRLQD	LIRKEGREALRSRWFLLTAGSFAMVALALAAFSMIGSGYIGLAGFGRTAASLVNLSMLLASLMGLGLGALTWAAERESGTLAYLLSYPVSRAQVFVAKAAGGAIALAAAMGLGFGVTGLGIGLGGGLGGLEEIGRYAGLAAGATLLSWIAYGIGMAIGVGLRRQSTALGVTLIAWLTAVFLSDLGLMGLTWAIGLSPAWLWWLALLNPLHGFRILAMVMLNGSPDLLGPAGWFAWRTYGEALGPLLLGAMGIWLVLAFLVAALRFRGLRD	279	280	NODE_64_length_240112_cov_8.1109_185 # 211563 # 212402 # -1 # ID=44_185;partial=00;start_type=ATG;rbs_motif=AGxAGG/AGGxGG;rbs_spacer=5-10bp;gc_cont=0.694
	nosL	2143742816_nosL	NODE_64_length_240112_cov_8.1109_184	64.539	141	50	0	8	148	8	148	7.65e-66	194	NODE_64_length_240112_cov_8.1109_184	494	91	106	0	75.18	1	1	IALMLAGLVACARPSGPRPPDIVYGKDPCANCGMLINDPRFAAAYVTRNGQARLFDDIGCMIDYQRGHPEDVAAFYVRDFEGGGWIETDRATFVHAPDVPTPMGYGLLAFATRDRAEAFARDHGGQVMDWATARQTVRSPH	LVLLWLGVAACTRASGPRPPDIAYGKDPCAECGMIISDPRFAAAYVTRDGQARLFDDIGDMVVYHRKHSEDVAVFYVHDYETRAWIDATHAFFVSSPRVHSPMGYGLAAFSDRSRAEAFAREHGGEVKDWARLLQETQPPH	152	155	NODE_64_length_240112_cov_8.1109_184 # 210939 # 211403 # -1 # ID=44_184;partial=00;start_type=ATG;rbs_motif=AGGAG/GGAGG;rbs_spacer=11-12bp;gc_cont=0.626
	coxM	2143740265_coxM_JAD2	NODE_363_length_103174_cov_7.98081_95	90.816	294	27	0	1	294	1	294	0	531	NODE_363_length_103174_cov_7.98081_95	1367	267	280	0	95.24	1	1	MFPAPFEYVAPSTLDQAIRLLQQHGPDARLLAGGQSLIPMMRFRLVNPRILIDLHRIPGLDLLEEAQGVLRIGAMVRHRTVERAPLIQQRYPLLADTARVIADPIVRNRGTVGGSIAHADPAGDWGAALLAAKAEVVITGPQGRRIRQRAMPLEEFFTGPFMTALEPGEIVTEIRVPAPGPREAGAYLKIERKVGDFAVVAVGVQIALDADGICRKAGIGLCAVGPTSLRAREAEEWLIGKRLDEGVIARAGELAAAASQPNSDTRGPAEYKRDMVRVLTIRALRKALGRIPGA	MFPAPFEYVAPSTLDQAIRLLQQYGADARLLAGGQSLIPMMRFRLANPKVLIDLNRIPGLDFLEEDRGVLRIGAMVRHRAMERTPLIQQRYPLLADTARVIADPIVRNRGTVGGSIAHADPAGDWGAALLAAKAEVVITGPKGRRMGQRTLPLEDFFTGPFMTALQPGEIVTEIRVPAPGPREAGAYLKIERKVGDFAVVAVGVQIALDADGVCRKAGIGLCAVGPTSLRAREAEEWLIGKRPDESVIARAGELAAEASQPTSDTRGPAEYKRDMVRVLTVRALRKALERIPMA	294	295	NODE_363_length_103174_cov_7.98081_95 # 99972 # 100856 # 1 # ID=6_95;partial=00;start_type=ATG;rbs_motif=AGGAGG;rbs_spacer=5-10bp;gc_cont=0.664
	coxS	2143740266_coxS_JAD2	NODE_363_length_103174_cov_7.98081_96	88.043	184	22	0	1	184	1	184	3.6e-115	322	NODE_363_length_103174_cov_7.98081_96	824	162	171	0	92.93	1	1	MPARKGKRTTGAPRRGSTPEAVEAPRPAARQRIHVTVNGRPYEAEVEARTLLVYFIRDTLGLTGTHVGCDTTSCGACTVLLNGEAVKSCTVFAIQADGAEIMTVEGLAKDGELHPLQKAFWEHHGLQCGFCTPGMLMAAYAFLKENPRPSEEEIRIAISGNLCRCTGYMNIVKAIQHAAQEMAA	MPARKGKRATAAPRRTAARKAVEAVQPAARQRIRVTVNGHPYEADVEARTLLVYFLRDTLGLTGTHVGCDTTSCGACTVLLNGEAVKSCTLFAVQADEAEILTVEGLAKDGELHPLQKAFWEDHGLQCGFCTPGMLMTAYAFLMENPHPSEEEIRVAISGNLCRCTGYMNIVKAIQHAAQEMAA	184	186	NODE_363_length_103174_cov_7.98081_96 # 100932 # 101489 # 1 # ID=6_96;partial=00;start_type=ATG;rbs_motif=GGAGG;rbs_spacer=5-10bp;gc_cont=0.627
	coxL	2143740267_coxL	NODE_363_length_103174_cov_7.98081_97	95.102	490	24	0	1	490	1	490	0	931	NODE_363_length_103174_cov_7.98081_97	2406	466	479	0	97.76	1	1	MALPEQAHAVLGHPVRRKEDMRFIQGRGRYLDDIVLPRMAYLALVRSPYAHARIRSIRVDAAKAIPGVLAVITGEDLEELGLAWMPTLAGDKQMVLAVGKVLFQYQEVAAVVGETREAAVDGAQAVEVDYEPLPVVVDPFRALEPDAPVLREDREQKTNHIWHWEVGDREATEEALRRSDVVIRERIRFQRVHPAPLEPCGCIADFDRITGRLTLYVTSQAPHAYRTLLALVTKLPEHMIRVISPDIGGGFGNKVAIYPGYVCAVVASMMLGRPVKWVETRTENLTSTSFARDYHMMVELGATREGKVTALRVKTIADHGAFDASANPTRFPAGLFSICTGSYDFPVAFAEVDAVYTNKAPGGISYRCSFRVTEASYLIERAMDILADELGMDPAELRR…	MATTGQAHVVLGHPVRRKEDLRFIQGRGRYLDDIVLPRMAYMALVRSPYAHARIRSIRTDAAKAVPGVLAVITGEDLEELGLAWMPTLAGDKQMVLAVGKVLFQYQEVAAVVAESREAAVDGAQAVEVDYEPLPVVVDPFKALEPDAPILREDREQKTNHIWHWEVGDREATEEALHRSEVVIREHIKFQRVHPAPLEPCGCIADFDRVTGRLTLYVTSQAPHAYRTLLALVTKLPEHMIRVISPDIGGGFGNKVAVYPGYVCAIVASMMLGRPVKWVETRTENLTSTSFARDYHMTVELGATREGKVTALRVKTLADHGAFDASANPSRFPAGLFSICTGSYDFPVAFAEVDAVYTNKAPGGISYRCSFRVTEASYLIERAMDILADELGMDPAELRR…	783	493	NODE_363_length_103174_cov_7.98081_97 # 101519 # 102997 # 1 # ID=6_97;partial=00;start_type=ATG;rbs_motif=AGGAGG;rbs_spacer=5-10bp;gc_cont=0.641
	coxF	2143740268_coxF_JAD2	NODE_238_length_132267_cov_7.83269_3	85.801	331	47	0	1	331	1	331	0	571	NODE_238_length_132267_cov_7.83269_3	1471	284	303	0	91.54	1	1	MGWRLSGGLRLDELIRDLEARGEAFVIATVVRRQPPVSAHVGDRAVITADGRIYGWVGGGCAHDLILREARAVLASRRPRLLRIAPEANGEDIEEEARTVATMACPSRGELEVFLEPWVREPQLLIFGESPLAQALAVFGQVLGYEVTRLVQRMPSPEETSGIRLTPLEAMPAFSPNDELYVVVASMGHYDEEALAAALRTPARYIGLVASRRRAQALLNFLQQSGWSEADLGRIRAPAGLDLGAVTQEEIALAVMAEIMQERRRAMAERMVSLESTSPRARDPVCGMEVEVATARYHVEWGGQRFYFCCAHCRQAFLADPARYTPAVAQP	MGWRLSGGIRLDELIRDLEARGEAFVIATVVRRQPPVSARVGDRAVITADGQIYGWVGGGCAHDLILREARTVLASRRPRLLRITPEAVGEDLEEEARSVATMACPSRGELEIFLEPWVREPQLLIFGESPLARALALFGQALGFEVTQVIQREALQEALEGVRIVPLGAMPVFSSRDELYVVVASMGHYDEEALAAALRTSARYIGLVASRRRAQVILDLLRQSGWPEADLGRIRAPAGLDLGAVTQEEIALSVMAEIMQERRRAMAEQMVPVESTPVRARDPVCGMEVEVVTARYHAEWEGQRFYFCCAHCRQAFLADPARYAPAVAQP	335	332	NODE_238_length_132267_cov_7.83269_3 # 1304 # 2299 # 1 # ID=74_3;partial=00;start_type=ATG;rbs_motif=GGAG/GAGG;rbs_spacer=5-10bp;gc_cont=0.653
		Query accession dot version	Subject accession dot version (database hit)	Percentage of identical matches	Alignment length	Number of mismatches	Number of gap openings	Start of alignment in query	End of alignment in query	Start of alignment in subject (database hit)	End of alignment in subject (database hit)	Expectation value (E-value)	Bit score	All subject Seq-id(s), separated by a ';'	Raw score	Number of identical matches	Number of positive-scoring matches	Total number of gaps	Percentage of positive-scoring matches	Query frame	Subject frame	Aligned part of query sequence	Aligned part of subject sequence	Query sequence length	Subject sequence length	All subject title(s), separated by a '<>'
HR22	nosZ	2143742820_nosZJAD2	BEHY01000140.1_3	94.26	662	38	0	1	662	1	662	0	1271	BEHY01000140.1_3	3290	624	643	0	97.13	1	1	MMHGKAKGVILGVLMALVAACARGRATPVAGLPAEAQTVIRERGLSPEDVVAALRTYMPGGKYDEYVMFSSGGHSGQVLVIGIPSMRLLKVIGVFTPEPWQGYGFGEKGTLEVLAEGFARGKPLLWGDTHHPALSETEGEYDGQFLFINDKANARLAVIDLRDFETKQIVKNPNAISDHGGGFVTPNTEYVVEGPQYAAPIGWEYAPLDQYKDKYRGLLTFWAFDRQKGRVDLDRSFQIELPPYWQDLCDAGKKVSYGWVFCNSINTEMATGGIEEGNPPFEAGTAKNEMDYLHIINWKKAEELIRAGKYEVINGIKVIRLETAAREGVLFFAPEPKSPHGVDVAPGGEYIVVGGKLDPHVTIYSFEKIQKAIAAGNFERDPFGVPVLRFEDVKEAQVE…	MMRWKAFTVIPLLLALLVAACARGAATPAAGLPAEAQAVIKDRGLSPEDIVAALRTYVPGGKYDEYIMFASGGHSGQVLVIGIPSMRLLKVIGVFTPEPWQGYGFGEKGTLEVLEGGFARGKPILWGDTHHPALSETEGDYDGQFLFINDKANARLAVIDLRDFETKQIVKNPNAISDHGGGFVTPNTEYVVEGPQYAAPIGWEYAPLDQYKDQYRGLLTFWAFDRQKGRVDPDRSFQIELPPYWQDLCDAGKKVSYGWVFCNSINTEMATGGIEEGNPPFEAGTARNEMDYLHIINWKKAEELIQAGKYEVINGIKVIRLPTAAQEGVLFFAPEPKSPHGVDVAPGGEYIVVGGKLDPHVTVYSFEKIQKAIAAGNFERDPFGVPVLKFEDVKEAQVE…	662	663	BEHY01000140.1_3 # 1004 # 2992 # -1 # ID=140_3;partial=00;start_type=ATG;rbs_motif=AGGAGG;rbs_spacer=5-10bp;gc_cont=0.647
	nosD	2143742818_nosDJAD2	BEHY01000151.1_3	74.435	708	178	1	34	741	1	705	0	1024	BEHY01000151.1_3	2647	527	591	3	83.47	1	1	GATLEVRGGVHYGPIRIDKPLTLIGVDSPVLDGQGQGTVLWITAPGVTVRGFVIRRSGRSLTHEDAGIRAEGAPGVILEDNRLEDVLFGIYLKDSPGARIRNNRIRGLDVPEAERGDAIRLWYSSDAYIEGNETERGRDVIIWFSDRSVLRDNRFRGGRYGIHYMYCNESLAEGNILEGNYVGIYMMYSRGGVFRRNRFLHHRGPSGYGMAFKDSDEILAEENLFANNTAALFLDNTPRAEGSPVRFERNLFAYNGIGVLALPMVRGAIFRENVFWENEQQAAVQGEGNLQANRWEGNFWSDYVGFDVDGDGIGDLPYRSQRLFEALTDAMPALRIFWGTPAVQALETAARLVPFFAPQVRLEDPAPRMRPPAGIPGAAGHTPRHRVPWLGLGLGGLAL…	GATLEVHGGVYHGPFQIDKPLTLIGVNGPVLDGQGRGTVLRIRAPHVTVRGFVIRNSGRSLEHEDAGILAEGAPGVTLEDNYLEDVLFGIYLKDSPGGRIRNNTVIGLDVPEAERGDAIRLWYSPDARIEGNRTRRGRDVIIWFSDRSLLRGNQFEGGRYGIHYMYCNGSQVEGNVLRGNFVGVFVMYSRGLALRGNRFLHQRGPSGYGLAFKDSDDVRVEGNLFLDNTAAIFLDNTPREEGSPVRFERNIIAYNGIGVLALPMVRGVTFRENVFWENEQQAATQGEGSLMASDWRGNFWSDYAGFDADGDGIGDVPYRSRRVFESLMDQAPLLRLFWGTPAMQALESAAILVPFFEPQIRLEDPAPRIRPPAQAPVKATGDAGGWI---GLGLGGILL…	742	706	BEHY01000151.1_3 # 1356 # 3473 # -1 # ID=151_3;partial=01;start_type=Edge;rbs_motif=None;rbs_spacer=None;gc_cont=0.675
	nosY	2143742817_nosYJAD2	BEHY01000151.1_2	79.528	254	50	1	5	256	3	256	1.48e-107	310	BEHY01000151.1_2	793	202	218	2	85.83	1	1	RW--MIWKEGREILRSRWFGITAGSFVAVALALAALSMGGSGYIGLAGFGRTAAALVNLSALIASLMGLGLGAMTWAAERESGTLAYLLSYPVSRAQVWAAKAIGGAMALAAAMALGFGITGLIIGLGGGLGGAEEAGRYAALAAGATLLAWITYGLGMTLGVGLRRQSTALGLSLLAWLAGVFLSDLGLMGLVGTFALSPAVLWWLTVLNPLHAFRILAMVWLNGSPDLLGPAGAYAWRTYGEALGPMLTAIM	RWPLLIHKEGREALRSRWFLFTAGSFAMVALALAAFSMIGSGYIGLAGFGRTAASLVNLSMLLASLMGLGLGALTWAVERESGTLAYLLSYPVSRAQVFVAKAAGGAIALAAAMGLGFGVTGLGIGLGGGLGGLEEIGRYAGLAAGATLLSWIAYGIGMAIGVGLRRQSTALGVTLIAWLIAVFLSDLGLMGLTWAIGLSPAWLWWLALLNPLHGFRILAMVMLNGSPDLLGPAGWFAWRTYGEALGPLLLGAM	279	280	BEHY01000151.1_2 # 495 # 1334 # -1 # ID=151_2;partial=00;start_type=ATG;rbs_motif=GGxGG;rbs_spacer=5-10bp;gc_cont=0.694
	nosL	2143742816_nosL	BEHY01000151.1_1	67.308	104	34	0	8	111	8	111	4.41e-49	150	BEHY01000151.1_1	379	70	82	0	78.85	1	1	IALMLAGLVACARPSGPRPPDIVYGKDPCANCGMLINDPRFAAAYVTRNGQARLFDDIGCMIDYQRGHPEDVAAFYVRDFEGGGWIETDRATFVHAPDVPTPMG	LVLLWMGVAACARASGPRPPDIAYGKDPCAECGMIISDPRFAAAYVTRDGQARLFDDIGDMVVYHRKHSEDVAAFYVHDYETRAWIDATQAFFVSSPRVHSPMG	152	111	BEHY01000151.1_1 # 3 # 335 # -1 # ID=151_1;partial=10;start_type=ATG;rbs_motif=GGAGG;rbs_spacer=5-10bp;gc_cont=0.658
	coxM	2143740265_coxM_JAD2	BEHY01000015.1_40	43.015	272	149	3	1	272	1	266	6.23e-56	178	BEHY01000015.1_40	452	117	163	6	59.93	1	1	MFPAPFEYVAPSTLDQAIRLLQQHGPDARLLAGGQSLIPMMRFRLVNPRILIDLHRIPGLDLLEEAQGVLRIGAMVRHRTVERAPLIQQRYPLLADTARVIADPIVRNRGTVGGSIAHADPAGDWGAALLAAKAEVVITGPQGRRIRQRAMPLEEFFTGPFMTALEPGEIVTEIRVPAPGPREAGAYLKIERKVGDFAVVAVGVQIALDADGICRKAGIGLCAVGPTSLRAREAEEWLIGKRLDEGVIARAGELAAAASQPNSDTRGPAEYK	MYPASFEYYRASTLQEALNLLRQH-PEAKVLAGGHSLIPLMKLRLANPPALVDIGRVAELKGIRRIDGTVVIGALTTHREVEFSEELKRWCPLLPEVAAHIGNPPVRNMGTIGGSLAHADPAADYPAAMLALGATIKAVGPNG----ERTIAADDFFVGMLTTALQPGEILTEVHVPVLGKGMGWAYEKFPHPASRYAVVGVAVVVRVE-NGICREARIGITGAAPKAFRAVNVEQALAGQRLDEATVRAATENMVSPEGLLSDPFASAAYR	294	266	BEHY01000015.1_40 # 45552 # 46349 # 1 # ID=15_40;partial=01;start_type=ATG;rbs_motif=AGGAGG;rbs_spacer=5-10bp;gc_cont=0.684
	coxS	2143740266_coxS_JAD2	BEHY01000015.1_38	66.667	150	50	0	33	182	5	154	4.32e-80	231	BEHY01000015.1_38	590	100	131	0	87.33	1	1	IHVTVNGRPYEAEVEARTLLVYFIRDTLGLTGTHVGCDTTSCGACTVLLNGEAVKSCTVFAIQADGAEIMTVEGLAKDGELHPLQKAFWEHHGLQCGFCTPGMLMAAYAFLKENPRPSEEEIRIAISGNLCRCTGYMNIVKAIQHAAQEM	VTITVNGQVYQREVEPRMLLVHFLREVLGLTGTHVGCDTSQCGACVVLMDGKAVKSCTVFAVQADGAQITTIEGLARNGQLHPLQEGFWEMHGLQCGFCTPGMILAAYDLLQRNPNPTDEEIRHALEGNYCRCTGYHNIVRAVRYAAEKL	184	159	BEHY01000015.1_38 # 42606 # 43082 # 1 # ID=15_38;partial=00;start_type=ATG;rbs_motif=AGGAGG;rbs_spacer=5-10bp;gc_cont=0.654
	coxL	2143740267_coxL	BEHY01000015.1_39	48.387	775	383	10	11	773	6	775	0	725	BEHY01000015.1_39	1871	375	520	17	67.1	1	1	LGHPVRRKEDMRFIQGRGRYLDDIVLPRMAYLALVRSPYAHARIRSIRVDAAKAIPGVLAVITGEDLEELGLAWMPT---LAGDK---QMVLAVGKVLFQYQEVAAVVGETREAAVDGAQAVEVDYEPLPVVVDPFRALEPDAPVLREDREQKTNHIWHWEVGDREATEEALRRSDVVIRERIRFQRVHPAPLEPCGCIADFDRITGRLTLYVTSQAPHAYRTLLA-LVTKLPEHMIRVISPDIGGGFGNKVAIYPGYVCAVVASMMLGRPVKWVETRTENLTSTSFARDYHMMVELGATREGKVTALRVKTIADHGAFDASANPTRFPAGLF-SICTGSYDFPVAFAEVDAVYTNKAPGGISYRCSFRVTEASYLIERAMDILADELGMDPAELRRRN…	FGVAMKRREDPRFITGRGTYVDDLTLPGLVYAAMVRSPHAHARIRAIHKEKALQHPGVIAVFTGKDMVDSGVKSLPCGWLLPGMKLPPHYPMAVDKVRHMGEIVAVVIAEDRYTAEDAAELVEVEYEPLPAVADGAKALQPGAPAVHD--EAPDNVCFRWSIGDREKTDEAFRRAHRTVKVELVNQRLIPNAIEPRAAMAQYNPATDEYTLWVTSQNPHVHRLLMAAFVLGIPEHKLRVISPDVGGGFGSKIFLYPEETIVTWAARQVGRPVKWTARRRESFVSDAHGRDHITEAELAVDEKGKILGMRVKTIANLGAYLSTFAPA-IPTYLYGTLLSGQYEIPTIYCEVTGVFTHTTPVD-AYRGAGR-PEATYVVERLMDLMARELGEDPAEFRRKN…	783	785	BEHY01000015.1_39 # 43130 # 45484 # 1 # ID=15_39;partial=00;start_type=ATG;rbs_motif=AGGAGG;rbs_spacer=5-10bp;gc_cont=0.674
	coxF	2143740268_coxF_JAD2	BEHY01000001.1_109	33.061	245	147	6	27	264	20	254	7.14e-29	108	BEHY01000001.1_109	271	81	123	17	50.2	1	1	IATVVRRQPPVSAHVGDRAVITADGRIYGWVGGGCAHDLILREARAVLASRRPRLLRIAPEANGEDIEEEARTVATMACPSRGELEVFLEPWVREPQLLIFGESPLAQALAVFGQVLGYEVTRLVQR--MPSPE---ETSGIRLTPLE-AMPAFSPNDELYVVVASMGH-YDEEALAAALRTPARYIGLVASRRRAQALLNFLQQSGWSEADLGRIRAPAGLDLGAVTQEEIALAVMAEIMQERR	LCTVIRARGSVPRHEAAKMLVYPDGQIRGTIGGGEMEARVIREALQALQEGHPRLVRY--------VLSDPKQGDPGVC--GGEMEIFIEPLLPPPTILIIGAGHVGRALAHLARWLGFRVLVSDDRPEFCTPEWIPDADGFLVGPPEDVLPNAPIHARTYIVLTTRNHPLDVRILPLILDTPAPYIGVIGSKRRWLLTAKVLQEKGVPLEQLARVRSPVGLELNAETPEEIAVSIMAEIIAIRR	335	274	BEHY01000001.1_109 # 117043 # 117864 # 1 # ID=1_109;partial=00;start_type=ATG;rbs_motif=AGGAGG;rbs_spacer=5-10bp;gc_cont=0.673
