# Supplementary material for: Genomics, Exometabolomics, and Metabolic Probing Reveal Conserved Proteolytic Metabolism of Thermoflexus hugenholtzii and Three Candidate Species From China and Japan
Source: Front Microbiol. 2021 May 3;12:632731. doi: 10.3389/fmicb.2021.632731 (PMC8129789; doi:10.3389/fmicb.2021.632731)
Supplement: Supplementary file 6 [file Table_6.XLSX]

## Sheet: A. Significant
Supplemental Table S6. Log2 fold change and HMDB classifications for compounds that were found to be significantly different in at least one pair-wise comparison between sterile incubated control and culture growth with T. hugenholtzii JAD2T or sterile incubated control and sterile start medium.
Compound Label	Identified Compound	Log2 fold change (Sterile Incubated/Start Medium)	Log2 fold change (Culture/Sterile Incubated)	HMDB code	hmdb_supc	hmdb_class	hmdb_subc	dir_parent
glycine_positive_12p03	glycine	-0.371559	0.653476	HMDB00123	Organic acids and derivatives	Carboxylic acids and derivatives	Amino acids, peptides, and analogues	Alpha amino acids
L-alanine_positive_10p97	alanine	-0.602128	1.04391	HMDB00161	Organic acids and derivatives	Carboxylic acids and derivatives	Amino acids, peptides, and analogues	L-alpha-amino acids
L-homoserine_positive_11p32	homoserine	-0.7785	0.926221	HMDB00719	Organic acids and derivatives	Carboxylic acids and derivatives	Amino acids, peptides, and analogues	L-alpha-amino acids
L-proline_positive_8p49	proline	-0.359427	0.583404	HMDB00162	Organic acids and derivatives	Carboxylic acids and derivatives	Amino acids, peptides, and analogues	L-alpha-amino acids
L-serine_positive_12p59	serine	-0.918511	1.21401	HMDB00187	Organic acids and derivatives	Carboxylic acids and derivatives	Amino acids, peptides, and analogues	D-alpha-amino acids
4-Methyl-2-oxovaleric_acid_positive_1p59	ketoleucine	-0.967434	-0.138095	HMDB00695	Organic compounds	Organic acids and derivatives	Keto acids and derivatives	Short-chain keto acids and derivatives
83-88-5_positive_4p49	riboflavin	-1.54561	0.203805	HMDB00244	Organoheterocyclic compounds	Pteridines and derivatives	Alloxazines and isoalloxazines	Flavins
adenosine_positive_4p32	adenosine	0.0929276	-1.27426	HMDB00050	Nucleosides, nucleotides, and analogues	Purine nucleosides	NA	Purine nucleosides
nicotinic_acid_positive_5p37	nicotinic acid	-0.21505	1.17432	HMDB01488	Organoheterocyclic compounds	Pyridines and derivatives	Pyridinecarboxylic acids and derivatives	Pyridinecarboxylic acids
2_5-Diaminopentanoic_acid_negative_22p06	ornithine	-0.968087	0.792124	HMDB32455	Organic acids and derivatives	Carboxylic acids and derivatives	Amino acids, peptides, and analogues	Alpha amino acids
adenine_negative_4p19	adenine	0.134119	-0.905256	HMDB00034	Organoheterocyclic compounds	Imidazopyrimidines	Purines and purine derivatives	6-aminopurines
thymine_negative_2p48	thymine	0.197701	1.81323	HMDB00262	Organic compound	Organoheterocyclic compounds	Diazines	Hydroxypyrimidines

## Sheet: B. POS Mode Intensity
Supplemental Table S6. Positive mode peak height values for compounds for all samples. All treatments had an initial sample size of five but sample "Start Medium 3" was removed from analysis due to consistently low peak height values.
Compound Label	Incubated Medium 1	Incubated Medium 2	Incubated Medium 3	Incubated Medium 4	Incubated Medium 5	Start Medium 1	Start Medium 2	Start Medium 4	Start Medium 5	Culture 1	Culture 2	Culture 3	Culture 4	Culture 5
glycine_positive_12p03	127571	156222	109348	100352	122033	131268	188150	141030	176622	186999	148840	222015	263657	146686
TRIMETHYLAMINE_N-OXIDE_positive_6p54			21759.2		23781.8	23143.9		20620.7
glycolic_acid_positive_9p92									7032.88
acetoin_positive_4p99	107156	131626	39126	79385.6	97557.6	105165	88418.8	90798.7	93765.1	84785.2	104376	126831	93536.9	74509.3
L-alanine_positive_10p97	257649	374702	272625	214613	299976	269043	405710	426510	622609	578134	426880	501346	929174	491345
sarcosine_positive_10p24	80482.8	67903.9	85301.5	61656	70163.4	72182.3	62971.8	72563.9	67141.7	68619.8	74936.7	97271.4	89019	68807.5
beta-alanine_positive_11p67	83519.6	62170.7	87569.7	62074.7	64138.7	68217.1	68887	75367.8	66890.1	80547.9	70793.3	73432.8	81342.2	69946.9
lactic_acid_positive_7p72
4-Oxobutanoic_acid_positive_7p70	29820.3	9657.2	12351.7	22723.7	24342.6	26039	19770.1	34265.9	19621.3	31853.6	19940.1	15250.9	61903.6	38415.2
4-aminobutyric_acid_positive_11p72	95742	100616	109159	92374.2	107787	108306	90344.3	105863	106904	96467.6	91990.2	95439.7	97214.4	110247
glycocyamine_positive_10p28	327210	387008	355180	370640	397955	358272	441916	368308	435431	346612	306685	259460	381370	425747
malonic_acid_positive_11p91				10308.1			11162.2	11878.9		9053.56			7678.46
malonic_acid_positive_12p04				10308.1	11183		11162.2	11878.9		9053.56			7678.46
S2-hydroxybutanoic_acid_positive_5p48							40307.2				53637.4		22500.6	7518.19
L-serine_positive_12p59	309109	307525	211444	194601	304895	348554	615448	607054	436412	760016	605167	814379	621268	278909
DIETHANOLAMINE_positive_9p66	179154	200363	129795	124595	166761	143956	205444	662963	194919	117874	88239.9	99077.9	186381	146373
D-Glyceric_acid_positive_10p64				7680.04	6801.18									8680.09
D-Glyceric_acid_positive_11p04				7680.04	6801.18									8680.09
hypotaurine_positive_11p20	14588.9		34044.5			42038.5	42360.9	55615.7	17001.7				9563.9
cytosine_positive_6p16	3.43257e+06	272246	391099	2.1383e+06	1492528	636084	1.63565e+06	688088	1.04671e+06	229336	2262039	711933	2.89908e+06	330097
uracil_positive_3p05	4.77804e+06	3797983	3.27985e+06	3.44658e+06	3652698	4.7362e+06	4.76168e+06	5566993	3.95752e+06	82537.5	3.84087e+06	4534534	3949837	3.25837e+06
creatinine_positive_4p57		296958		177261	195767	222713	537895	2.07602e+06	623022	394953	253747	451374	801272	278232
dihydrouracil_positive_2p45	168862	102714	194119	124296	75090.3	118351	351032	166149	90409.3	184404	141380	88417.7	200824	141721
L-proline_positive_8p49	1.19808e+06	1.56054e+06	1.10567e+06	1.10767e+06	1.17736e+06	1.25508e+06	1570323	1.95773e+06	1.52812e+06	1.8064e+06	1.33153e+06	1865309	1921327	2.28945e+06
maleic_acid_positive_2p52										54495.9	17780	29702.8	109579
Fumaric_acid-2_3-13C2_positive_15p55					4241.44
glycocyamine_positive_11p82													12801.7	8972.62
TRIMETHYL_GLYCINE_positive_6p42	748877	1.55582e+06	811531	895960	816916	792548	1.06417e+06	2.98311e+06	1.08043e+06	817660	667859	911143	976375	1.17549e+06
L-valine_positive_8p74	1194083	1.4555e+06	1.03537e+06	1.04478e+06	1.22722e+06	1.1803e+06	1.57565e+06	1436529	1.3545e+06	1.70239e+06	1.26594e+06	1389040	3.92771e+06	1.13289e+06
5-Aminovaleric_acid_positive_12p25	289599	324042	293360	351817	302912	290426	324604	325101	320628	289996	291038	246499	308058	358489
succinic_acid_positive_13p62
L-homoserine_positive_11p32	168831	172423	111806	91572.3	160289	192209	245016	257193	272932	286646	243862	286424	386096	136531
L-threonine_positive_11p31	168831	172423	111806	91572.3	160289	192209	245016	257193	272932	286646	243862	286424	386096	136531
Purine_positive_2p93	47740.5	15559.7			17073.1	18489.5	9103.88	17407.9		31268.1		30449.2
nicotinamide_positive_2p45	896100	306886	247528	270718	274648	397172	530691	788030	410467	162548	132618	126205	123168	276385
nicotinic_acid_positive_5p37	2.76333e+06	1.8197e+06	2.16043e+06	2.33257e+06	1.97615e+06	2.56027e+06	2.19979e+06	3277903	2.22504e+06	4.65105e+06	5071513	6148783	4872188	4199677
taurine_positive_11p32	1.02535e+06	663585	845561	706690	731601	1123594	601433	765247	694923	1069742	1289008	1.10459e+06	1.13027e+06	383981
thymine_positive_2p65	54513880	51947680	49156888	45861876	50092992	67568912	63572012	63843984	58599916	2.10395e+06	44588904	65319676	41585132	45333144
D-Pyroglutamic_acid_positive_9p19	227409	168595	181726	168994	244365	163860	155454	276141	201310	167654	181836	276615	214892	409278
l-Pipecolic_acid_positive_8p33	1.81713e+06	746259	850639	689492	1.24805e+06	1.22776e+06	554343	1.10988e+06	649417	1.34011e+06	2045302	1.58754e+06	3.21472e+06	214845
Citraconic_acid_positive_2p49			33808.3		80667.6	80070.5	18019.8	78830.1	50685.2	121442		40694.3		7222.58
4-Methyl-2-oxovaleric_acid_positive_1p59	2436734	3.19621e+06	2.21362e+06	1.20435e+06	2.19452e+06	3.91668e+06	3.443e+06	5789783	4441652	1683733	1.51086e+06	2.45799e+06	2.21599e+06	2.35036e+06
L-Hydroxyproline_positive_10p74	118027	171683	182674	107570	131578	115910	140779	176162	118947	163385	143629	213187	147590	274319
creatine_positive_10p73	22554.1	29541.3	17152.8	22069.6	40419.2	21596.3	60794	446565	56741.3	52081.8	32058.2	30002.3	22875.1	43283.4
Alanine_betaine_positive_5p84	4.78957e+06	1.73315e+06	1.75001e+06	2.60435e+06	3.29922e+06	3.31033e+06	2.05058e+06	3154335	2437410	2.74011e+06	3.95101e+06	3.57125e+06	5822188	651170
Propiobetaine_positive_9p45	2.3318e+06	1.66362e+06	1.44364e+06	1.48144e+06	1.84419e+06	1.96587e+06	1.77636e+06	2.10455e+06	1503011	1382342	2.18101e+06	1.6893e+06	2.27362e+06	1.59118e+06
L-leucine_positive_7p21	491875008	447945024	552776512	491785312	558183616	622606016	436182944	646733056	431991264	447221312	341996736	400357984	637367104	469757952
l-isoleucine_positive_7p58	325765280	173776992	155866304	232922240	268873760	284156832	259186336	281289184	210318240	217560752	270997344	234598080	358056256	184506160
ETHYLMALONIC_ACID_positive_4p97	438050	455841	261242	290888	315064	396289	345438	452435	413461		293223	350492	395914	420490
ETHYLMALONIC_ACID_positive_14p00		4838.24			9790.82	7711.83		6924.11		7873.54		13015.2		10708.2
L-asparagine_positive_12p55	63910.7	60641.3	55566.8	43142.5	53160.6	54543.1	69509.1	89356.4	111115	94003.5	89708.8	104712	111907	67493.9
2_5-Diaminopentanoic_acid_positive_22p15	92319.1	84070.9	52908.5	53127.9	102053	141360	265928	438818	132057	266841	199826	268463	152461	58947.9
617-45-8_positive_13p91	20257.8	38890.4	21843.2	27737.2	34887.4	34297.1	64732.6	53134.7	51422.1	50395.9	50246.2	59361.8	40322.4	52880.7
D-malic_acid_positive_16p05											10804.4
adenine_positive_4p18	29159268	37685644	67645136	28387552	20465930	34381300	26644364	24818730	19084924	11137031	17612706	23785420	27742410	9638242
hypoxanthine_positive_5p01	289678816	283922496	328263936	250561920	234373616	306623520	257495104	294438944	265802864	2.24715e+06	256743952	291195104	277700896	87670912
PHENYL_ACETATE_positive_7p56	314453	157302	70500	140021	50814.5	66135.5	68910.9	106861	185298	91615.5	86162	53601.8	142183	260764
3-carboxy-1-methylpyridinium_positive_7p33	48961.9	48490.2	38825.7	41817	69828.5	32856.4	33977.9	87292	32896	72720.5		56738.4	30759.6	43535.8
3-Hydroxybenzoic_acid_positive_7p52	10115.9	13841.8		12820.8	7247.39	24846.7	7526.81	12178.6	9888.17			19015.7	8926.25	15165.1
Salicylate_positive_2p22	129631	205827		70437.9	105301	99862.8	93836	122769		133305	195377	103210	184875	197316
Stachyhydrone_proline_betaine_positive_6p06	58268.2	107652	70704.9	78796.3	45909.6	51041.9	77575.4	126081	81856	44253.2	153652	47417.1	49667.3	61030.9
4-Guanidinobutyric_acid_positive_11p32	21987.7	34982.5	30280.2	43799	42666.3	25029.9	52454	21864.8	47662	40946.2	25260.4	19363.1	59178.7	54784.8
gamma-butyrobetaine_positive_9p82	55374.5	49233.3	81669.4	30626.1	66924.7	46487.8	38192.9	72694.8	33708.6	28847.8	53194.6	42456.3	77710.8	40152.8
2-ketoglutaric_acid_positive_15p01
5-Methoxy-5-oxopentanoic_acid_positive_2p42	5849207	6.34363e+06	16765684	4479797	4.30673e+06	769430	740034	938020	540107	6.6588e+06	7442384	8971917	4.03784e+06	6289497
L-glutamine_positive_12p09	104846	54052.3	52021.5	29813.2	32145	66974.1	60745.1	65475.8	35660.3	52965.5	63819.5	41714	80092	306372
DL-Lysine_positive_21p68	391795	558485	357340	300777	468420	681705	593618	591255	957219	615347	468525	608612	1.19441e+06	320054
DL-Glutamic_acid_positive_13p45	20523.6	20471.1	15202	18253.2	29686	19831.6	27615.8	39307.4	15950.8	32335.3	18899	18929.8	32244.5	155543
2-Propenoicacid_3-phenylpositive_2p40	138932	133094		112145	103659	110737	126577	111849	151086	87284.2	119601	88462.2	71894.1	113374
L-methionine_positive_8p39	50381772	4.65258e+06	7446788	27951914	30892620	15749489	27405188	18391110	20471952	42836028	36202816	17835324	58957224	8.33615e+06
3-methyladenine_positive_4p50	44218.1	66608.5	71971.2	69433.1	82836.9	37396.3	79736.9	136669	84257.7	76627.5	44366.2	37578.3	76652.5	71637
87-69-4_positive_17p26														6798.53
alpha-D-Ribofuranose_positive_6p23			34207.8	29605.7		22950.1	26109.5	21318.4	33803.5			37101.9	43060.3	18941
Alpha-d-xylopyranose_positive_10p88	21434.5	20120.9	24484.4	18333.4	20391.8	31039.3	19457.5	21917.4	25437.1	22093.8	23150.3	25800.1	26688.6	20109.1
guanine_positive_7p46	37592704	68662240	58346244	51230380	32739934	64753352	46222124	34406216	22795978	1264389	43143956	27399866	56249692	5.93997e+06
xanthine_positive_6p25	866937	469560	391127	471168	507508	518081	510435	640152	485820	204639	1.58644e+06	1.46122e+06	877378	760694
vanillin_positive_1p31	1.27601e+06	863803	868215	1.17714e+06	1.21392e+06	1.49119e+06	1213555	1.40278e+06	1.04698e+06	1413108	1.46303e+06	1.27645e+06	1.17363e+06	737708
17199-29-0_positive_3p57	22556.2	26341.3		13859.1	27615.9	24960.9	15277.3	25850.5	18253.9	26626.2	20392.1		28324.5	18761.1
xylitol_positive_7p65					15035.1
2-Amino-3-hydroxybenzoic_acid_positive_7p46	27504	20961.9	26562.9	17735.1	21438	53090.2	40104.6	39590.7	46393.8	13501.6	29698.3	27052.6	20081.1	44393
2_3-Dihydroxybenzoic_acid_positive_3p96													21906.5
2_3-Dihydroxybenzoic_acid_positive_7p49												57882.5		9841.64
Orotic_acid_positive_8p29
L-Dihydroorotic_acid_positive_10p06							10142.8						8466.93
Betonicine_positive_8p27	530143	360288	400065	322056	326614	497168	414830	733571	428478	298971	461202	621736	277181	484890
2-Aminohexanedioic_acid_positive_14p05
CHEBI_39547_positive_9p44	13691.2	20513.3	7940.74	12977.9	18258.4	12862.2	17255	19413.2	16021.9	13095.6	11861.6	24644.6	10911.1	15882.6
p-coumaric_acid_positive_5p54	31329.4	28522	29064.2	30980.3	26901.3	27537.3	15827.1	27398.7	16482.6	23261.6	27070	26856.3	51194.8	14148.9
L-phenylalanine_positive_7p22	1005243008	1006307584	1252702464	881589376	1073694528	1209832192	837778304	1394235776	910947904	934388608	696629248	1263320832	997954624	957733376
phosphoenolpyruvate_positive_5p28	22783.7			35288.9				35624.5				48584.2
phosphoenolpyruvate_positive_7p52				35288.9				35624.5				48584.2
uric_acid_positive_11p21								12624.9		48725.9
Vanillic_acid_positive_5p93									14933.1
pyridoxine_positive_2p75	44227304	49803628	88359352	38428616	37372720	55201640	53868744	49983520	46679816	42687892	38537776	44291684	45578332	84075504
trans-Aconitic_acid_positive_17p75				6751.56					8507.26
138-59-0_positive_12p79			7869.73			10181.4	9810.12	9279.8			9259.4
DL-Arginine_positive_22p07	8.22748e+06	7.10132e+06	4930484	4.09351e+06	7054014	11541003	5.41536e+06	8687097	7942362	6602728	6.67566e+06	7537622	11234675	3.70789e+06
indole-3-acetic_acid_positive_4p62	30065.2	29423.7	26200.2	20308.8	22779				14006.2	22855.6	28089.6	31727.7		22838.9
L-citrulline_positive_12p94	213432	54822.4	57191.1	19747.5	60799	72855.2	53549.5	75633	53414.6	76811.8	70404.9	86436.9	47570.2	37244.8
4-methylumbelliferone_positive_1p31	1.66103e+06	1.40828e+06	441992	945878	1.19044e+06	1420603	1.06116e+06	1.16761e+06	1.08519e+06	1.06546e+06	1.28056e+06	1.39109e+06	1.20087e+06	891150
Arsenobetaine_positive_6p35
gluconolactone_positive_4p69	31761.7	20431.5	32782.4	15857	17302.1		13832.1	26263	17249.6	22454		28968.9	30422.2	17694.3
gluconolactone_positive_5p30	31761.7	20431.5	70394.4	15857	17302.1		18815.6	26263	17249.6	22454		28968.9	30422.2	17694.3
myo-inositol_positive_13p02	12214.7	10520.2	10530.2	9149.72	9575.72	13740.8	7678.02	14554.6	10953.9	9950.95	9824.5	22410.1	8853.12	13039.6
D-Psicose_positive_6p92			13808.7	19825.8	37922.1		15684.7	29573.2	17636.7	15503.4	12504.5	19782.3	15208.3	10304.2
D-Psicose_positive_11p98	12214.7	13562.8	10249.8	9696.05	11675.2	13740.8	7678.02	16553.7	10953.9	14077.5	9824.5	22410.1	14581.3	13039.6
theobromine_positive_3p00	1111395	163410	653519	643197	836861	1.00136e+06	563947	602227	534071	614170	926240	577385	2.15673e+06	190190
paraxanthine_positive_2p93	1111395	163410	653519	643197	836861	1.00136e+06	563947	602227	534071	614170	926240	577385	2.15673e+06	190190
theophylline_positive_2p55	1111395	163410	653519	643197	836861	1.00136e+06	563947	602227	534071	614170	926240	577385	2.15673e+06	190190
L-tyrosine_positive_9p84	139654672	103571048	79861328	83015984	100312552	107543528	93874240	119489080	87456152	114654616	105437448	117409080	137189424	94470880
D-mannitol_positive_9p82	13649121	10181040	7.94421e+06	8.22178e+06	9941807	10744498	9368059	11955258	8474389	10916171	10316771	11387062	13442534	9198043
1946-82-3_positive_11p86	123462	101357	127733	105179	100597	115160	88816.4	134199	93460.9	94296	115595	128864	112700	105109
isocitric_acid_positive_1p39	123580	189364	89056.7	143538	170381					89749.7	185330	214184	106845	157004
quinic_acid_positive_11p01	7838.83	10222.4	11476.9	7722.79	12761.2	9674.37		9144.87			9909.68	11283.6	12961.7	14311.1
C10H10O4_positive_3p71				18387.8			16900.9	16767.3	17682.7	27454.6		22202.6		10823.1
levodopa_positive_12p01												17871.2		12395.9
SYRINGIC_ACID_positive_4p87				24294.7
L-tryptophan_positive_8p29	90598096	73371376	72134192	58978724	54867220	94257920	76055832	108386264	74461688	58024756	95735408	125992136	51089112	70228440
L-kynurenine_positive_7p80	1.20757e+06	885114	802277	619088	1.12392e+06	1.28511e+06	1.15689e+06	2.4519e+06	981391	648843	1.50238e+06	973012	2489974	546512
Sinapyl_alcohol_positive_1p34	1.81686e+06	1.41707e+06	1.14221e+06	1.44382e+06	1.565e+06	1884534	1.89453e+06	1.85413e+06	1.64989e+06	1.67397e+06	1.66814e+06	1.81979e+06	1.71043e+06	791829
jasmonic_acid_peak_2_positive_2p04	108497	71139	65407.2	74048.5	154238	113267	92593.4	61385.4	181672	63541.3	89168	108021	121767	115944
D-pantothenic_acid_positive_7p24	58986.3													25303.9
N-Acetyl-alpha-D-glucosamine_positive_7p34											61232.3	64669.1
N-Acetyl-D-Mannosamine_positive_8p01	1.07753e+06	1.10102e+06	635139	238336	2724680	375911	500413	1.62198e+06	613484	211937	274823	373035	3.81823e+06	149952
L-Carnosine_positive_13p42	16012.6	10996.2	13303.1	11070.4	12776.9	16153.5	13792.4	46257.8	12637.7	15328	14152.4	21078.7	46427.3	11323.6
Ergothioneine_positive_10p86				11463.8
thymidine_positive_2p590	19320984	18735384	12684608	14526773	14840074	15860313	15598416	19251890	15145049	14339137	14391532	17095206	19921992	13743567
thymidine_positive_2p591	159281	141244	72027.3	143164	147974	242582	192496	296472	274271		165198	66958.5	97522.2	183795
cytidine_positive_7p42	1.03625e+06	704230	729777	565760	660381	675001	626575	856766	602779	697850	760001	1.15056e+06	951963	352451
uridine_positive_4p78	4.2829e+06	5170998	2.38435e+06	3.08565e+06	3.4033e+06	4.34487e+06	3.84995e+06	4725108	4.13713e+06	69414.8	2892613	3.85915e+06	3.96301e+06	4434470
Biotin_V-H_positive_7p13	110200	84566.3	62074.6	53631.9	52777.7		56310.7	57194.5	37158.1	80078.6	73623	71720.8	117339	34001.4
N-Acetyl-D-tryptophan_positive_5p50			28115.6					27418.1	18261.2		27347.8			41284.3
2-Oalpha-D-glucopyranosyl_glycerol_positive_9p56	22409.5	11652.3	16256.8	11561.6	7899.47	11105.9	10441.7	13461.5	12958.5	13605.1	9490.49	17940.3	14560.2	11737.7
hexadec-9-enoic_acid_positive_1p28	451368	325826	151615	309431	430641	334766	328220	337026	336165	362769	271141	403752	455048	253250
palmitic_acid_positive_1p34								48978.8	48940.9		26829.5			17907.5
Robison_ester_positive_16p60	6971.79
thiamine_positive_8p15	142652	94877	39415.2	121373	134149	433151	285443	386678	304179	103169	158157	122318	141652	61107.2
Abscisic_acid_positive_2p07	123924	74123.3			70200.5								187831
adenosine_positive_4p32	52475656	47756688	60433408	34189132	44524120	41313168	40534688	53254828	44454200	3.80069e+06	13817932	28147266	29024960	24177438
2_3Cyclic_AMP_positive_8p60	29115.8	18721.9	34323.8	21730.7	33900.4	15016.2	14056.1	31890.3	25145.8	10089.3	13276.8	26858.7	18547.1	16295
inosine_positive_6p58	30612794	27554338	21128036	20269774	26376298	26451078	24062260	34148592	25385790	210745	18644526	31411918	21875450	33299684
octadeca-9_12-dienoic_acid_positive_1p28	1.05543e+06	756992	589045	687600	973217	780599	935713	1.08029e+06	903373	843123	535735	716333	739809	535701
9-octadecenoic_acid_positive_1p27	884932	603725	208525	443691	658471	526733	469962	515003	598361	492713	401650	534283	1.31984e+06	465133
guanosine_positive_8p55	67795272	49741676	45567536	32652676	46676880	51782420	39826568	68273464	45437676	337380	35726448	62214972	43861060	38342060
stearic_acid_positive_1p26	98163.2	60950	29798.3	39916.5	60266.8	36923.2	78410	63835.2	114495	41037.1	42324.2	61452	328793	21093.7
Methylthioadenosine_positive_2p51	164216	157984	243683	134671	345077	113688	119343	298861	166307	55805.6	52057.7	141748	119002	96146.8
dCMP_positive_14p42
N-Acetylneuraminic_Acid_positive_12p11			9542.97									11760.3
Uridine_5monophosphate_positive_14p21	29757.4	8333.88	11413.2	10211.1	13842.1	8625.13	5651.69	41542.5	13708.4		11887.4	17208.1	14971.5	9749.83
cAMP_positive_8p29
dAMP_positive_12p86		8564.44
beta-nicotinamide_ribose_monophosphate_positive_14p90			7340.36								8640.95
Palatinose_positive_11p91			13756.9					17656.1		14192.5				13944.6
sucrose_positive_11p83			13756.9							14192.5
50-22-6_positive_1p31	429065	777410	316111	436879	295380	440680	405628	687195	362574	401071	426811	450478	437598	182138
83-88-5_positive_4p49	845127	310884	201249	312682	553453	1.18084e+06	786501	2.03911e+06	1.1861e+06	177571	388665	841765	542454	610300
chenodeoxycholic_acid_positive_1p34		57567.8			49403.8	167793	116036	161252		32062.2		70159	36749.5	33062.8
chenodeoxycholic_acid_positive_2p33	30570.8	50889.2	200351	43988	46151.5	32154.3	130100	42950.3	35439.4	54008.3	25574.9	33469.1	37097.4	19914.4
NSC3073_positive_15p63									5608.27
RAFFINOSE_positive_13p73					9512.78
URIDINE_5DIPHOSPHO-N-ACETYLGALACTOSAMINE_positive_15p23					6701.58

## Sheet: C. NEG Mode Intensity
Supplemental Table S6. Negative mode peak height values for compounds for all samples. All treatments had an initial sample size of five but sample "Start Medium 3" was removed from analysis due to consistently low peak height values.
Compound Label	Incubated Medium 1	Incubated Medium 2	Incubated Medium 3	Incubated Medium 4	Incubated Medium 5	Start Medium 1	Start Medium 2	Start Medium 4	Start Medium 5	Culture 1	Culture 2	Culture 3	Culture 4	Culture 5
glycine_negative_12p03	10242.8	0	0	0	0	0	0	11825.5	0	8871	0	0	0	0
TRIMETHYLAMINE_N-OXIDE_negative_6p54	0	0	0	0	0	0	0	0	0	0	0	0	0	0
glycolic_acid_negative_9p84	0	0	0	0	0	0	14192.9	0	10533.9	0	0	0	0	0
acetoin_negative_4p33	60666.7	28922.1	14725.4	0	0	0	13718.8	20613.3	0	0	0	19547.8	0	0
beta-alanine_negative_11p66	0	0	0	0	13620.8	0	0	0	0	0	0	0	0	0
L-alanine_negative_11p00	0	12200.2	0	0	0	0	0	0	16708	0	0	8397.36	8256.43	0
sarcosine_negative_10p09	0	0	0	0	11405.6	12379.8	0	0	11946.3	0	0	0	0	0
lactic_acid_negative_7p38	0	0	0	0	0	0	0	145907	13169.6	0	38205.3	0	0	0
4-Oxobutanoic_acid_negative_7p25	50538.5	33560.7	25176.1	45564.1	67498.5	48941.5	36747	42329.6	98477.5	37089	32873.2	29555.5	27257.7	20712.7
4-aminobutyric_acid_negative_11p78	0	18538.9	22885.4	0	21077	19952.3	20955.3	19365.8	18686.5	0	21594.2	23050.7	0	18573.4
dl-3-Aminoisobutyric_acid_negative_10p52	46573.1	46822.2	17949.3	57055.8	44559.1	24414.8	19555.1	25142	37607.7	18497.5	26725.4	21154.4	22452.1	25289.8
malonic_acid_negative_11p91	17846.1	18940.3	15792.3	13133	22377.4	18304.8	20021.7	22279.5	21555	14150.9	17782.1	27659.9	19166.9	48604.3
S2-hydroxybutanoic_acid_negative_5p81	33072.4	30822.6	19384.1	19867.3	28058.8	27208.5	22421.7	18818.3	31020.8	20895.5	30018.6	25207.9	25974.5	25036
L-serine_negative_12p58	950924	839362	591425	467522	675835	971038	1.40809e+06	1.35078e+06	1.36746e+06	2.02422e+06	1.73469e+06	3.0758e+06	1.43915e+06	565107
DIETHANOLAMINE_negative_9p66	0	0	0	7578.14	0	0	0	0	0	0	11979.2	0	0	8825.4
D-Glyceric_acid_negative_11p04	167414	133086	137886	144440	145743	136736	143456	137329	146767	141830	125321	141128	134161	127355
hypotaurine_negative_11p29	0	0	13646.2	0	10562.2	18770.8	12531.8	14807.6	11864	0	0	0	0	0
cytosine_negative_6p17	41745.8	61399.1	85076.8	71271.5	69529.8	65564.6	70321.2	81710.4	77946	74521.2	75121.2	44544.3	75460.9	68565.3
uracil_negative_2p94	6.3908e+06	996491	951420	1.23672e+06	929223	1.2119e+06	1.78308e+06	1.32367e+06	1537403	19406852	4752017	1.46334e+06	9161885	936518
creatinine_negative_4p59	45474.4	96909.8	40717.2	38041.9	96133.6	49118.1	163503	411557	125813	113766	49539.7	102458	188483	38497.8
dihydrouracil_negative_2p47	1.80218e+06	882915	1.28719e+06	1114074	1483180	1750752	1.19117e+06	1.38735e+06	1.35341e+06	1.09261e+06	1.34795e+06	1349455	2.35421e+06	756889
L-proline_negative_8p51	536456	559212	386925	289177	470878	449844	578973	710409	529949	646555	574098	850243	669550	627998
Fumaric_acid-2_3-13C2_negative_15p44	16170.4	14154	9577.01	13872.5	15186.1	11718.4	16928.7	13566.9	10509.2	16765.3	13324	17095.5	12020.7	43670.2
maleic_acid_negative_2p42	149317	105500	115020	93121.1	92905	84222.7	82277	109549	140829	72159	99298.1	93406.4	115038	1.31077e+06
glycocyamine_negative_12p01	0	9998.97	0	0	0	0	0	0	0	0	0	0	0	0
5-Aminovaleric_acid_negative_12p25	86940.9	74797.1	64236.4	73919	75289.1	67432.3	93081.4	97983.6	74037.1	97672.8	68029.6	87795.5	62196.4	124674
L-valine_negative_8p76	562654	443552	396663	271205	428470	405858	542360	630364	597193	770697	579052	793916	2.80851e+06	385384
TRIMETHYL_GLYCINE_negative_6p40	41114.7	43888.3	43560.1	39387.9	36075.6	47701.5	33596.9	51595.9	35402.3	27327.9	52163.1	63438.4	29857.2	36503.9
succinic_acid_negative_13p41	185807	171629	145925	143880	155846	149509	168808	223967	187235	162452	151610	213593	168870	455942
L-homoserine_negative_11p87	67367	75652.2	62437	61355	69150.3	80393.4	88647.6	98279.2	88265.1	94277.8	107139	114436	98125.4	58566.6
L-threonine_negative_11p31	506307	442726	304670	276730	395634	492162	551003	659428	737708	844060	743183	1.10261e+06	1.00182e+06	224985
Purine_negative_2p93	0	18978.9	34231.7	0	13752.6	17613.6	0	43711.9	67511.7	66570	48686.1	41624.8	0	0
nicotinamide_negative_2p46	60947.4	72343.2	50671.7	55901.1	46147.1	105984	27086.2	95322.4	50352.5	53669.2	71662.3	55738.2	73762.9	114444
nicotinic_acid_negative_6p24	1962907	893196	918355	909986	1.13977e+06	1382877	1112390	1.55485e+06	894227	2355940	2.91868e+06	3.65698e+06	2.64862e+06	1.90314e+06
taurine_negative_11p36	2.33556e+06	1.32845e+06	1618546	1.1631e+06	1633944	2.29489e+06	1.21867e+06	1.67917e+06	1365861	2.0496e+06	2889191	3.20261e+06	2.35778e+06	860294
thymine_negative_2p48	44904752	45068532	47751280	35007188	38999416	43086644	35058932	37887136	31660650	275453408	142187648	129024360	90383752	107033736
D-Pyroglutamic_acid_negative_9p21	4.5629e+06	2.90021e+06	1.46606e+06	1819073	2504176	2579877	1.792e+06	3.65452e+06	2.14354e+06	2.39152e+06	2646614	4.63494e+06	2.43604e+06	10620187
l-Pipecolic_acid_negative_8p38	70770.9	78234.6	62103.4	69199.9	74966.6	100523	74896.2	96398.9	80028.8	72914.6	83689.4	98807.6	97465.5	79758.8
Citraconic_acid_negative_2p37	541018	1.27949e+06	727476	834555	795510	329404	746933	1506592	616342	797909	725760	731833	414424	4.68806e+06
4-Methyl-2-oxovaleric_acid_negative_1p50	390445	387311	265647	302785	341187	327879	251405	307275	235482	247103	302034	410317	319442	569041
L-Hydroxyproline_negative_10p92	84356.8	73930.3	70499.3	68985.6	90225.6	87519	72733.6	82949.1	73869.7	107752	110338	113509	124141	79856.2
creatine_negative_11p06	20286.7	15076.5	19803.1	11925.2	14948.6	18601	13966.8	19724.7	12144.8	15398.3	21163	19318	17561.4	8264.99
l-isoleucine_negative_7p60	472960768	192820848	204597584	288006880	343238752	365151104	323192416	367444032	304562592	278509152	387213472	366398240	547028800	202460448
L-leucine_negative_7p20	806249984	948689216	674292864	694889024	803859136	925061120	911678976	1003715648	806384064	719742656	897338752	923803392	1015374400	780816000
Alanine_betaine_negative_5p69	227781	119750	187885	201972	190174	162341	175558	243815	227156	167421	213143	197603	190552	210482
Propiobetaine_negative_9p45	6.07048e+06	3.0369e+06	2380817	2.87576e+06	3.35588e+06	3.99459e+06	3.47005e+06	4.35781e+06	3.16457e+06	2739172	4.15737e+06	4249243	5.27071e+06	2.3781e+06
ETHYLMALONIC_ACID_negative_4p23	156436	110741	67581.8	61499.1	90507.2	148647	84100.3	75877.7	55875.6	52845.4	98197	57428.7	73565.8	139080
L-asparagine_negative_12p48	93724.1	116292	99695.7	57146.6	80143.2	82534.7	101000	134693	144110	163888	129126	180268	155556	121534
2_5-Diaminopentanoic_acid_negative_22p06	314675	273257	197367	169972	268030	494226	418402	594106	407731	467254	435134	560980	502904	152026
617-45-8_negative_13p77	69326.3	85929.7	59766.3	61443.8	64193.8	90829.6	148472	154728	141662	116837	89063	165803	77474.5	340862
D-malic_acid_negative_15p14	13011.3	10280.8	0	0	8751.39	10753.6	15162.3	8824.07	0	0	10017.7	11120	9584.31	15877.5
adenine_negative_4p19	46717196	52666468	42855676	40542592	34225476	50533376	40833164	36723348	30104336	14053275	22131404	28573990	38207736	12902056
hypoxanthine_negative_5p02	211534032	154823696	120674664	110478360	169395936	226992048	182467408	158045968	97459104	1.30446e+06	193743152	177981824	190256080	40311560
PHENYL_ACETATE_negative_7p28	42573.6	30250.8	35402.5	40733.9	43016.7	50170.5	40901.7	55208.4	43811.9	107501	36898.1	58076.6	61402.5	40800.8
3-carboxy-1-methylpyridinium_negative_7p35	72396.7	108600	58485.1	114358	88480.6	87268.7	91675.3	79206	64611.2	110819	85256.6	50537	47325.5	61016.2
3-Hydroxybenzoic_acid_negative_7p28	450579	573289	426097	553187	423067	227499	341629	624098	287737	737030	474557	624055	386454	451556
Salicylate_negative_2p21	7454098	6095524	5103310	4.41997e+06	4939359	3.54725e+06	3.28952e+06	5.98246e+06	3879762	6067083	6838014	8774781	5611671	5032987
Stachyhydrone_proline_betaine_negative_6p06	19929.3	0	15842.5	15504.1	18324.7	18880.8	12074.7	18941.5	0	17547.6	19431.4	30517.7	21654.3	14312.6
4-Guanidinobutyric_acid_negative_11p31	21063.8	20567.8	22314.7	19138.8	21546	39499.6	19033	16815.5	20021.2	23649.8	41531.8	25740.5	19894.7	16866.8
gamma-butyrobetaine_negative_9p92	17830.3	13130.1	23734.1	0	19291.7	12916.5	12705.7	14092.9	10560.8	0	13181.4	17238.1	22039.2	0
2-ketoglutaric_acid_negative_15p01	12413.6	9215.03	14253.5	9067.03	9323.69	11389.3	12673.1	10165.7	13604.3	12826.6	11529.1	18601.2	0	16086.6
5-Methoxy-5-oxopentanoic_acid_negative_2p14	235131	903020	213781	240724	194171	269910	504388	294485	204064	289050	239617	85598.6	261309	764927
L-glutamine_negative_12p12	270283	119281	83928.8	93116.4	133776	170052	113298	155668	116140	144966	190952	258234	238028	989670
DL-Lysine_negative_21p77	313782	357733	284767	250987	387265	536690	455357	453877	682442	436062	439819	475449	907420	214042
DL-Glutamic_acid_negative_13p51	25462.7	38312.5	24264.2	21594	23749.4	25421.5	26979.2	34309.2	26862.5	19322.4	26040.6	46759.1	26605.5	303133
2-Propenoicacid_3-phenylnegative_2p18	79938.6	191935	75038.6	81582.6	94314.6	123872	143766	182677	70516.9	171751	82032.7	88410.9	47340.7	430905
L-methionine_negative_8p36	68649928	5994415	8509838	28957628	33632320	22171312	31888208	23172434	24441448	44668308	51670260	28898758	66299052	7.88849e+06
3-methyladenine_negative_4p11	0	0	0	0	29818.1	0	24357.3	37023.7	0	36399.1	0	29389.9	0	0
87-69-4_negative_17p26	0	0	0	0	0	0	0	0	0	0	0	0	11225.1	0
alpha-D-Ribofuranose_negative_5p86	117904	97000	74688.7	74611.3	116860	154487	83785.6	137338	108331	17888.1	103775	80640.9	125727	128144
Alpha-d-xylopyranose_negative_10p56	62275.6	42795.3	45579.2	24007.1	46554.8	56746.8	39396.1	28140.4	35301.7	20107.3	56109.8	26070.4	57025.8	33060.4
guanine_negative_7p51	15884901	27926792	22349802	19904256	12950704	30602756	19260636	13713985	10610272	418210	20768648	13338627	24671038	2334806
xanthine_negative_5p86	21949630	10654713	11298700	11869402	12702235	14277737	13453903	16269380	12717356	4.12137e+06	47293560	40025540	22685144	20308922
vanillin_negative_1p49	3405573	2298734	2.63084e+06	3.66458e+06	2.35668e+06	2.05817e+06	1.58498e+06	35689236	1.75386e+06	5.34042e+06	3.33947e+06	3519992	4.41898e+06	1.03115e+06
17199-29-0_negative_3p05	213222	76540	86035.9	115453	116240	126019	105826	178020	137862	185951	75876.8	136897	69260.7	189192
xylitol_negative_7p79	22777.5	0	15010.2	0	0	0	0	22704.7	0	14496.4	0	0	0	0
2-Amino-3-hydroxybenzoic_acid_negative_7p32	49889.9	63331.8	55172	59443.2	37910	64729	24185.4	47537.8	44393.1	73861.1	53284.5	73140	39074.8	55999.3
2_3-Dihydroxybenzoic_acid_negative_4p10	87465.8	141552	53424.6	73762.9	149550	81270.7	92967.8	231173	98674.3	209809	154184	337175	114413	142072
2_3-Dihydroxybenzoic_acid_negative_7p49	25314	20006.9	20420.4	16681.7	25183	26667.8	35935.9	26805.5	21409.6	42313.6	26870.5	40667.2	29085.9	24175
Orotic_acid_negative_8p29	29961.6	20059.9	16303.9	26517.2	15592.5	30719.2	15880.8	32667.5	13406.8	21692.9	24010.3	41455.4	15086.4	27616.5
L-Dihydroorotic_acid_negative_10p25	63092.7	45261.2	46615.8	39139.6	53420	58214.1	52193.2	35344.8	45942.9	29651.5	32318.8	51240.8	65036.3	80175.1
Betonicine_negative_8p18	98025.2	90268	79796.4	87182.2	85556.4	129835	82763.9	131605	77413	80291.3	111089	105436	137769	86410.7
2-Aminohexanedioic_acid_negative_14p05	19224.9	18735.7	17275.8	13191.7	13740.9	16376.2	13482.8	16285.1	10964.1	12660.3	14431.4	17631.1	13126.7	40825.9
CHEBI_39547_negative_8p31	0	0	0	0	14232	0	0	0	14664.7	0	0	0	0	0
p-coumaric_acid_negative_4p39	44999.3	58538.1	52610.7	44118.4	36333.2	65552.8	34430.5	63745.9	46031.2	37441.6	39761.6	46383.3	32627.6	136439
L-phenylalanine_negative_7p25	1191274240	1386472704	1371828480	1068080832	1238265600	1484615168	1265508608	1667900544	1281313408	1075522432	1619756800	2018682624	1257002752	1214317952
phosphoenolpyruvate_negative_5p28	0	0	0	0	0	0	0	0	0	0	0	0	0	0
uric_acid_negative_11p28	18169.7	9109.76	0	0	10362.6	0	19048.3	48892.9	0	5462028	158531	67740.7	77014.3	20412.6
Vanillic_acid_negative_5p93	20891.2	26918.7	18949.6	55374.4	16079.1	19313.7	19199.8	23326.3	18137.4	25091.5	21399.3	32186.5	28253.8	25597.6
pyridoxine_negative_2p70	50405512	45753300	30740134	33037766	37192508	61761448	44936084	48314588	41948168	42634448	35146716	38797320	49832632	42923184
trans-Aconitic_acid_negative_17p65	0	0	0	0	8982.18	0	0	0	9525.7	7604.91	0	8678.44	0	0
138-59-0_negative_12p53	51721.1	42165.4	48277.3	43135.4	45676.8	26041.2	48335.4	52486.8	41184.9	44227	45494.3	47531.8	43848.3	61860.2
DL-Arginine_negative_22p00	1.21059e+06	1.03477e+06	839242	660417	1.09957e+06	2.03587e+06	898709	1.17739e+06	1.47887e+06	1.06892e+06	1.23284e+06	1351261	1.8758e+06	550237
indole-3-acetic_acid_negative_4p62	31619.4	21376.1	33186.3	18636.9	24539.7	21828.2	24204.8	41128.2	0	33786.6	37153	45703.4	44462.7	27497.4
L-citrulline_negative_12p98	116399	17150.7	20967.3	12350.2	17643.7	26982.1	22129	22322.2	15870.2	58861	59592.2	64872.5	35966.8	11859.3
4-methylumbelliferone_negative_1p56	54215.3	59987.8	56801.3	49762.6	51057.6	34277.6	30977.1	183435	48070.1	46127.2	25070.7	22809.5	47765.8	146160
Arsenobetaine_negative_6p66	0	19528.7	0	0	0	0	0	0	0	0	0	0	0	0
gluconolactone_negative_4p44	51495.1	44892.3	38182.1	39247.7	88497.5	428020	431608	921833	318805	93461.7	112757	120486	91484.1	32968.5
D-Psicose_negative_11p98	54542.5	61459.9	54018.4	49637.2	47505.3	59253.6	73852.1	317933	110048	50470.5	54116.6	57720.5	168195	55652.8
myo-inositol_negative_13p02	54542.5	61459.9	54018.4	49637.2	47505.3	59253.6	73852.1	317933	110048	50470.5	54116.6	57720.5	168195	52225.1
paraxanthine_negative_2p55	0	0	0	0	0	47580.7	0	0	0	0	601928	0	0	0
theobromine_negative_2p50	42826.8	0	0	0	25672.6	47580.7	0	33146.6	0	32807.1	601928	25902.6	179344	0
theophylline_negative_2p55	42826.8	0	0	0	25672.6	47580.7	0	33146.6	0	32807.1	601928	25902.6	179344	0
L-tyrosine_negative_9p82	213035808	145750832	111809704	114343584	136366688	164215744	138961584	188772336	121210280	176919264	160901520	218383712	210490912	117197768
D-mannitol_negative_9p82	20738012	14558099	461958	10623557	13515576	12037728	376552	18124754	10854357	335961	11453391	488251	8788925	178620
1946-82-3_negative_12p10	90913.8	84961.5	62196.2	57960.8	56150.5	78113	67502.1	97118.3	53476.8	61641.7	76088.7	108932	54272.8	93946.1
isocitric_acid_negative_2p19	0	0	0	0	43558.2	0	0	0	0	0	0	40593.2	0	0
quinic_acid_negative_11p38	18358.3	16374.7	14871.5	14051.8	18956.9	14313.4	21454.4	42177.7	15280.8	14957	16968.3	15781.3	15064.7	17620.6
C10H10O4_negative_3p71	0	0	0	48364	0	0	39700.7	49083.9	0	0	0	0	0	59820.6
levodopa_negative_14p21	15081.2	13281.3	17297.6	12872.9	14816.3	16861.8	15456.8	18364.2	16326.7	13731.6	10629.5	18648	12832.5	14571.5
SYRINGIC_ACID_negative_4p87	51184.9	44409.4	26065.6	38788.2	19404.4	0	33227.3	24146.6	0	0	0	0	0	41929.8
L-tryptophan_negative_8p30	119594432	93154256	84403976	69508328	68417648	121774360	94487680	132077728	90032208	68718936	121208992	185433328	59703492	83846616
L-kynurenine_negative_7p76	422822	268237	207057	154351	325547	351229	274361	688804	256298	145777	229602	318098	721877	138892
Sinapyl_alcohol_negative_1p53	711535	2.89799e+06	478219	508185	567613	548296	437466	546984	414723	608349	633863	708609	662382	648758
jasmonic_acid_peak_2_negative_1p96	0	26646.9	180746	42159.1	20325.2	34750.1	20090.2	39240.4	0	23364.4	0	25670.2	0	0
D-pantothenic_acid_negative_7p29	0	0	0	0	0	0	0	0	0	119891	0	0	0	768614
N-Acetyl-alpha-D-glucosamine_negative_7p58	117194	111861	49611.6	13617.7	325111	28366.5	13362.8	178978	67016.7	0	0	28057.3	310826	0
N-Acetyl-D-Mannosamine_negative_8p00	496393	445002	299651	99111.7	1.2367e+06	229326	256427	790506	341393	102808	147961	197457	1.70459e+06	66909.9
L-Carnosine_negative_13p91	14212.8	16237.3	0	0	13948.4	14056.7	20303.3	50027.3	13780.6	16249.7	16490.6	18439.8	14874.3	0
Ergothioneine_negative_10p86	0	0	0	0	0	0	0	0	0	0	0	0	0	0
thymidine_negative_2p49	286079776	252287152	267487088	209850976	239002384	311094528	245527920	319171744	258601552	22145720	222256736	286387776	237814256	173339136
cytidine_negative_7p50	915528	593666	602084	492696	522392	602866	503156	700023	544595	640600	863959	973490	884240	268873
uridine_negative_4p78	596982720	487477728	291740928	275989952	502009952	601646912	494848096	391921120	210946800	6.54092e+06	495789696	512946432	529904800	351572256
Biotin_V-H_negative_7p28	156637	74835.9	64382.7	82100.7	90890.1	112002	60978.2	59120.2	64126.1	102058	103407	130261	111617	23750.5
N-Acetyl-D-tryptophan_negative_5p16	28557.2	21709.4	22773.8	0	0	18250.4	21754.6	0	0	22983.6	0	27856.3	0	23816.1
2-Oalpha-D-glucopyranosyl_glycerol_negative_9p58	227916	18018.4	13676.2	16508.6	0	14326.6	88652.3	57472.4	0	0	16666.6	14988.2	0	0
hexadec-9-enoic_acid_negative_1p32	180510	129331	117062	121086	172929	117851	188697	624475	119797	381359	135901	197944	161027	183521
palmitic_acid_negative_1p34	3.77859e+06	1.96445e+06	2.37771e+06	2578216	3.75128e+06	3.09881e+06	3.6341e+06	8650190	2965598	2902205	2.85583e+06	2.50322e+06	3.34714e+06	10780702
Robison_ester_negative_16p60	0	0	0	0	0	0	0	0	0	0	0	0	0	0
thiamine_negative_8p29	23283.2	0	0	26642.1	24277.2	126060	58206.5	72437.7	53453.5	0	34407.7	30689.8	27796.5	0
Abscisic_acid_negative_2p07	0	0	0	0	0	0	0	0	0	0	0	0	0	0
adenosine_negative_4p31	8066973	7.87491e+06	6064425	5.0302e+06	6987575	6736085	6.51236e+06	6.79506e+06	6378233	637898	1.90645e+06	3.55116e+06	4.81526e+06	3.1215e+06
inosine_negative_6p63	90925256	88705472	72803872	65979656	76324912	80359304	77874448	99427200	81917904	273071	59352876	94353864	68549256	106926256
octadeca-9_12-dienoic_acid_negative_1p31	32979.4	38819.7	0	21138.2	20859.2	38004.5	32698.6	1.88914e+06	28616.9	0	32010.2	0	32570.6	79207.1
9-octadecenoic_acid_negative_1p29	539957	416647	164824	192018	206787	884815	269339	5334115	470307	179516	233353	332558	306762	683005
guanosine_negative_8p61	64762772	47692116	43456960	30998218	51544596	47972808	42283680	66851924	49399636	288460	35823908	67114632	39430488	38027412
stearic_acid_negative_1p29	3973941	1.91503e+06	2.42946e+06	2.69495e+06	3.534e+06	2.54642e+06	3398438	4667766	2844341	2617460	2.8137e+06	2.62465e+06	3.0624e+06	12596511
Methylthioadenosine_negative_2p43	64794.8	64832.9	60908.5	0	65024.9	0	0	115402	0	162816	82722.2	135632	61674.6	65149
dCMP_negative_13p53	0	0	0	0	0	0	0	0	0	0	0	0	0	0
N-Acetylneuraminic_Acid_negative_12p02	0	0	0	0	0	0	0	0	0	0	0	0	0	0
Uridine_5monophosphate_negative_13p53	146232	58074.2	47257.6	51256.2	74729.4	62159.2	49043.6	160747	65980	0	61911.8	124816	68253.1	79247.2
cAMP_negative_8p33	0	0	0	0	0	0	0	0	0	0	0	0	0	0
2_3Cyclic_AMP_negative_8p60	0	0	0	0	0	0	0	0	0	0	0	0	0	0
dAMP_negative_12p46	0	0	0	0	0	0	0	0	0	0	0	0	0	0
beta-nicotinamide_ribose_monophosphate_negative_14p90	0	0	0	0	0	0	0	0	0	0	0	0	0	0
Palatinose_negative_11p81	85210.4	92766.9	98934	107215	87820.2	91977.4	87778.6	245335	85838	79970.7	113792	107047	72122	66360.2
sucrose_negative_11p83	85210.4	92766.9	98934	107215	87820.2	91977.4	87778.6	582142	85838	79970.7	113792	107047	72122	66360.2
50-22-6_negative_1p43	301303	414021	304936	239612	262849	155497	115263	1.6145e+06	127631	174505	305204	363098	288309	83627.3
83-88-5_negative_4p79	336172	119486	72631.7	134227	284056	628109	454371	714311	516886	112732	168541	319647	311572	283889
chenodeoxycholic_acid_negative_1p33	79153.3	83106.6	57261.5	24742.3	54097.7	40858.6	26616.9	0	32724	0	0	36417.9	36925.3	47994.3
NSC3073_negative_16p29	0	0	0	0	0	0	0	0	0	0	0	0	0	0
RAFFINOSE_negative_14p07	20808.7	12030	10198.7	10025.7	9527.82	0	12911.5	49054.9	11130.1	15554.1	11473.6	0	10136.4	11154.4
URIDINE_5DIPHOSPHO-N-ACETYLGALACTOSAMINE_negative_15p23	0	0	0	0	0	0	0	0	0	0	0	0	0	0

## Sheet: D. Compound Identification
COMPOUND ANNOTATION									COMPOUND IDENTIFICATION SCORES									MS1 INTENSITY INFORMATION			MSMS INFORMATION				MSMS EVALUATION	ION INFORMATION			M/Z EVALUATION		CHROMATOGRAPHIC PEAK INFORMATION				RT EVALUATION
Compound #	Identified Metabolite	Name of metabolite searched for	Labels of Overlapping Compounds	Inchi Keys of Overlapping Compounds	Molecular Formula	Polarity	Exact Mass	Inchi Key	MSMS Score (0 to 1)	m/z score (0 to 1)	RT score (0 to 1)	Total ID Score (0 to 3)	Mass Spec Inititative Identification Level	Isomer details	Identification notes	MS1 notes	MS2 notes	Maximum MS1 intensity across all files	Filename w/ maximum MS1	Retention time of max intensity MS1 peak	File with highest MSMS match score	RT of highest matched MSMS scan	Number of ion matches in msms spectra to EMA reference spectra	List of ion matches in msms spectra to EMA reference spectra		Adduct	Theoretical m/z	Measured m/z	mass error (delta Da)	mass error (delta ppm)	Minimum retention time (min)	Maximum retention time (max)	Theoretical retention time (peak)	Detected RT (peak)	RT error (absolute delta)
Unique for study	Some isomers are not chromatographically or spectrally resolvable.	Name of standard reference compound in library match.	compound with similar mz (abs difference <= 0.005) or monoisotopic molecular weight (abs difference <= 0.005) and RT (min or max within the RT-min-max-range of similar compound)	List of inchi keys that correspond to the compounds listed in the previous column			monoisotopic mass (neutral except for permanently charged molecules)	neutralized version	1 (MSMS matches ref. std.), 0.5 (possible match), 0 (no MSMS collected or no appropriate ref available), -1 (bad match)	POS MODE: 1 (delta ppm </= 5 or delta Da </= 0.001), 0.5 (delta ppm 5-10 and delta Da > 0.001), 0 (delta ppm > 10) NEG MODE: 1 (delta ppm </= 10 or delta Da </= 0.0015), 0.5 (delta ppm 10-15 and delta Da > 0.0015), 0 (delta ppm > 15) (NOTE: neg mass calibration more error at low mass)	1 (delta RT </= 0.5), 0.5 (delta RT > 0.5 & </= 2), 0 (delta RT > 2 min)	sum of m/z, RT and MSMS score	Level 1 = Two independent and orthogonal properties match authentic standard; else = putative [Metabolomics. 2007 Sep; 3(3): 211-221. doi: 10.1007/s11306-007-0082-2]	Isomers have same formula (and m/z) and similar RT - MSMS spectra may be used to differentiate (exceptions) or RT elution order									mean # of fragment ions matching between compound in sample and reference compound / standard; may include parent and isotope ions and very low intensity background ions (these do not contribute to score)		MSMS score (highest across all samples), scale of 0 to 1 based on an algorithm. 0 = no match, 1 = perfect match. If no score, then no MSMS was acquired for that compound (@ m/z & RT window).	More than one may be detectable; the one evaluated is listed	theoretical m/z for a given compound / adduct pair	average m/z within 20ppm of theoretical detected across all samples @ RT peak	absolute difference between theoretical and detected m/z	ppm difference between theoretical and detected m/z	Retention range including start and end of detection of an m/z value (Note: Peak Height is calculated as the highest intensity of an m/z within the min/max RT range. Peak Area is calculated as the integrated area under the curve for an m/z within the mix/max RT range.)		theoretical retention time for a compound based upon reference standard at highest intensity point of peak	average retention time for a detected compound at highest intensity point of peak across all samples	absolute difference between theoretical and detected RT peak
index	identified_metabolite	label	overlapping_compound	overlapping_inchi_keys	formula	polarity	exact_mass	inchi_key	msms_quality	mz_quality	rt_quality	total_score	msi_level	isomer_details	identification_notes	ms1_notes	ms2_notes	max_intensity	max_intensity_file	ms1_rt_peak	msms_file	msms_rt	msms_numberofions	msms_matchingions	msms_score	mz_adduct	mz_theoretical	mz_measured	mz_error	mz_ppmerror	rt_min	rt_max	rt_theoretical	rt_measured	rt_error
0-NEG	ornithine	ornithine			C5H12N2O2	negative	132.09	AHLPHDHHMVZTML-UHFFFAOYSA-N	1	1	1	3	Exceeds Level 1					1.24184e+06	20150322_pHILIC_NEG_MSMS_BH17.h5	22.2242	20151124_pHILIC_NEG_MSMS_BH_IncCtrl_5.h5	21.06	2	87.044,131.081	0.8428	[M-H]-	131.083	131.081	0.0013	10.1895	20.65	23.65	22.22	21.9	0.32
1-NEG	adenine	adenine			C5H5N5	negative	135.054	GFFGJBXGBJISGV-UHFFFAOYSA-N	1	1	1	3	Exceeds Level 1					634256064	20150322_pHILIC_NEG_MSMS_BH3.h5	4.0574	20151124_pHILIC_NEG_MSMS_BH_IncCtrl_4.h5	4.58	3	92.024,107.035,134.046	0.9722	[M-H]-	134.047	134.046	0.0012	9.0121	3.86	4.82	4.06	4.24	0.18
2-NEG	thymine	THYMINE			C5H6N2O2	negative	126.043	RWQNBRDOKXIBIV-UHFFFAOYSA-N	0	1	1	2	Level 1				no MSMS acquired	322929952	20150322_pHILIC_NEG_MSMS_BH53.h5	2.15727	20150322_pHILIC_NEG_MSMS_BH62.h5	2.48	1	125.035	0	[M-H]-	125.036	125.034	0.0013	10.6494	2.34	3.01	2.16	2.5	0.35
4-POS	serine	serine			C3H7NO3	positive	105.043	MTCFGRXMJLQNBG-REOHCLBHSA-N	1	1	1	3	Exceeds Level 1					5.64554e+06	20150320_pHILIC_POS_MSMS_BH17.h5	12.6538	20151124_pHILIC_POS_MSMS_BH_IncCtrl_4.h5	12.64	4	60.045,70.030,88.040,106.050	0.9055	[M+H]+	106.05	106.05	0.0001	1.3679	12.33	13.11	12.65	12.62	0.03
8-POS	adenosine	adenosine			C10H13N5O4	positive	267.097	OIRDTQYFTABQOQ-KQYNXXCUSA-N	1	1	1	3	Exceeds Level 1					1452102144	20150320_pHILIC_POS_MSMS_BH24.h5	4.1501	20151124_pHILIC_POS_MSMS_BH_IncCtrl_5.h5	4.52	10	57.034,73.030,82.066,85.029,115.039,133.050,136.062,137.067,268.104,269.107	0.925	[M+H]+	268.104	268.104	0.0002	0.7704	3.88	4.99	4.15	4.32	0.17
3-POS	proline	proline			C5H9NO2	positive	115.063	ONIBWKKTOPOVIA-BYPYZUCNSA-N	1	1	1	3	Exceeds Level 1					73544104	20150320_pHILIC_POS_MSMS_BH17.h5	8.3937	20150320_pHILIC_POS_MSMS_BH27.h5	8.51	3	70.066,72.082,116.071	0.8955	[M+H]+	116.071	116.071	0.0001	0.6995	8.25	9.02	8.39	8.49	0.1
9-POS	nicotinic acid	nicotinic acid			C6H5NO2	positive	123.032	PVNIIMVLHYAWGP-UHFFFAOYSA-N	1	1	1	3	Exceeds Level 1					23938356	20150320_pHILIC_POS_MSMS_BH14.h5	5.62525	20150320_pHILIC_POS_MSMS_BH14.h5	5.23	5	78.035,80.050,96.045,124.040,125.043	0.9244	[M+H]+	124.039	124.039	0	0.2075	5.02	6.34	5.63	5.39	0.24
2-POS	homoserine	homoserine			C4H9NO3	positive	119.058	UKAUYVFTDYCKQA-VKHMYHEASA-N	1	1	1	3	Exceeds Level 1					9190407	20150320_pHILIC_POS_MSMS_BH17.h5	11.5805	20151124_pHILIC_POS_MSMS_BH_IncCtrl_4.h5	11.37	8	56.050,57.054,74.061,75.064,84.045,102.055,120.056,120.066	0.7714	[M+H]+	120.066	120.066	0	0.0086	11.06	12.07	11.58	11.39	0.19
0-POS	glycine	glycine			C2H5NO2	positive	75.032	DHMQDGOQFOQNFH-UHFFFAOYSA-N	0	1	1	2	Level 1				no MSMS acquired	1.0467e+06	20150320_pHILIC_POS_MSMS_BH17.h5	11.9822						[M+H]+	76.0393	76.0399	0.0006	7.3252	11.8	12.54	11.98	12.05	0.07
6-POS	ketoleucine	4-METHYL-2-OXOVALERIC ACID			C6H10O3	positive	130.063	BKAJNAXTPSGJCU-UHFFFAOYSA-N	0	1	1	2	Level 1				no MSMS acquired	5789783	20150320_pHILIC_POS_MSMS_BH34.h5	1.5751						[M+H]+	131.07	131.07	0.0001	0.8482	1.1	2.55	1.58	1.48	0.1
7-POS	riboflavin	riboflavin			C17H20N4O6	positive	376.138	AUNGANRZJHBGPY-UHFFFAOYSA-N	0	1	1	2	Level 1				no MSMS acquired	3.17452e+06	20150320_pHILIC_POS_MSMS_BH58.h5	4.3561						[M+H]+	377.146	377.146	0.0001	0.277	4.12	5.23	4.36	4.55	0.19
1-POS	alanine	alanine			C3H7NO2	positive	89.0477	QNAYBMKLOCPYGJ-REOHCLBHSA-N	0.5	1	1	2.5	Level 1				co-eluting nearby m/z, extra fragments detected	13587754	20150320_pHILIC_POS_MSMS_BH24.h5	10.9213	20150320_pHILIC_POS_MSMS_BH19.h5	10.89	2	72.082,90.056	0.2488	[M+H]+	90.055	90.0554	0.0004	4.4244	10.74	11.51	10.92	11	0.07
